# Supplementary material for: Modeling Transcriptional Regulation Using Gene Regulatory Networks Based on Multi-Omics Data Sources
Source: Research Square preprint supplement (doi:10.21203/rs.3.rs-112300/v1), 2020-12-01
Supplement: Supplementary file 1 [file 18f0fbe89ec1d43ecbf3c804.xlsx]

## Sheet: S5A
TF_Name	Mean_ENET_Coef_Tepic	rank_tepic	Mean_ENET_Coef_Tepic_GRN	rank_grn
REST	-1.40692	80	-1.29041	80
CTCF	-0.784149	79	-0.665119	78
ELK1	-0.509559	78	-0.194089	75
FOS	-0.384801	77	-0.0142269	58
TCF3	-0.374865	76	-0.0366128	66
POU2F2	-0.27603	75	0.0509172	36
ETS1	-0.215731	74	0.0386991	38
IRF5	-0.214622	73	-0.151326	73
EBF1	-0.185544	72	-0.360073	77
PBX3	-0.174868	71	-0.0675664	69
RELA	-0.163826	70	0.00405652	46
IRF3	-0.147623	69	-0.0377782	67
RELB	-0.125051	68	0.187653	24
MYC	-0.0742133	67	-0.0554993	68
FOXK2	-0.0663111	66	-0.214682	76
MXI1	-0.0642019	65	0.015868	43
SP1	-0.0619275	64	-0.0240864	61
ZEB1	-0.0593776	63	-0.0233853	59
SREBF2	-0.00619119	62	-0.068931	70
RFX5	-0.00604859	61	0.00759359	44
PKNOX1	-0.00540769	60	-0.0238526	60
SRF	-0.00305716	59	-0.00312178	55
IRF4	-0.00144638	58	-0.0139031	57
NR2C2	-7.34e-05	57	0.354911	16
ZNF24	0	56	-0.0310692	63
ZBED1	0	55	0	54
TCF7	0	54	0	53
NR2C1	0	53	-0.0333139	64
NFE2	0	52	0	51
MEF2B	0	51	0	50
MEF2A	0	50	0.0315485	39
MAFK	0	49	-0.0307828	62
JUND	0	48	0	49
JUNB	0	47	0.0930822	33
BATF	0	46	-0.0962371	72
BACH1	0	45	0	48
TBX21	9.07e-05	44	0.0219104	41
BHLHE40	0.00040846	43	-0.161468	74
PAX8	0.00397361	42	0	52
HSF1	0.0161138	41	0.106341	32
USF1	0.016407	40	-0.0768993	71
EGR1	0.0177786	39	0.076755	34
CEBPB	0.0209771	38	0.175254	28
SREBF1	0.0355995	37	-0.722593	79
ATF3	0.0375047	36	0.00472241	45
ATF7	0.0388498	35	0.0640073	35
STAT3	0.0415007	34	-0.00944151	56
SMAD5	0.0481451	33	0.393527	14
NR2F1	0.0482726	32	0.0484769	37
ESRRA	0.0558103	31	0.174718	29
E2F8	0.0649419	30	0.0011337	47
RXRA	0.0661796	29	-0.0350338	65
NFIC	0.0753315	28	0.217498	22
ATF2	0.101358	27	0.181491	27
PAX5	0.102911	26	0.182468	25
KLF5	0.125605	25	0.268269	21
ELF1	0.130761	24	0.278815	20
STAT1	0.135124	23	0.298738	19
MAX	0.146546	22	0.443001	11
USF2	0.148267	21	0.456058	9
SPI1	0.196017	20	0.166988	30
CREB1	0.201263	19	0.201735	23
NFYA	0.228065	18	0.366642	15
MEF2C	0.27202	17	0.560435	6
CUX1	0.278409	16	0.181784	26
ETV6	0.300554	15	0.423002	12
ARNT	0.304274	14	0.143695	31
NFYB	0.3308	13	0.304852	18
E2F4	0.355162	12	0.476008	8
RUNX3	0.411754	11	0.0280725	40
ZNF143	0.42144	10	0.412007	13
ZBTB33	0.520759	9	0.70479	4
ZBTB40	0.523213	8	0.520957	7
MYB	0.531266	7	0.449184	10
ZNF384	0.539705	6	0.351227	17
NRF1	0.597997	5	0.705468	3
NFATC1	0.671767	4	0.0168394	42
YY1	0.71559	3	0.675804	5
NFATC3	0.727318	2	0.720916	2
GABPA	1.39206	1	0.890621	1

## Sheet: S5B
TF_Name	Mean_ENET_Coef_Tepic	rank_tepic	Mean_ENET_Coef_Tepic_GRN	rank_grn
ZNF24	-0.618185	86	-0.683347	86
CTCF	-0.371874	85	-0.3582	85
STAT2	-0.371431	84	-0.25948	83
JUND	-0.360392	83	-0.218635	82
KLF16	-0.30358	82	-0.348583	84
ZNF263	-0.248847	81	-0.0754729	76
JUN	-0.242323	80	-0.160857	79
GATA1	-0.193112	79	-0.0160925	68
CTCFL	-0.179025	78	-0.112536	78
NR3C1	-0.163029	77	-0.0234641	69
GATA2	-0.145791	76	-0.0432568	74
ZBTB7A	-0.144449	75	-0.0345904	71
E2F6	-0.127931	74	-0.183971	80
ESRRA	-0.121534	73	0.0367721	59
SP2	-0.115819	72	-0.0351751	72
FOXA1	-0.089807	71	0.0854234	48
NR2C2	-0.0880555	70	-0.0261676	70
MYC	-0.0857638	69	-0.111827	77
MXI1	-0.0792038	68	-0.0117764	67
ELF1	-0.0601692	67	0.0422767	58
SP1	-0.0540716	66	0.0362275	60
CUX1	-0.0319191	65	0.198607	37
MNT	-0.0318682	64	-0.196358	81
ELK1	-0.0284722	63	-0.03705	73
USF1	-0.0271434	62	-0.0554442	75
JUNB	-0.0262191	61	0	65
ELF4	-0.02464	60	0.000231249	64
NFE2	-0.0120808	59	0.202125	36
SPI1	-0.0108266	58	0.292734	30
FOS	-0.00887296	57	0	66
IRF2	-0.00288467	56	0.063245	55
FOSL1	-0.00232927	55	0.0899856	46
REST	-0.000361354	54	0.0684272	54
MAFF	0	53	0.0970739	45
ZNF282	0	52	0.0816028	50
RFX5	0	51	0.086248	47
ZBED1	0	50	0.0242726	61
E2F7	0	49	0.0119722	63
MAFK	0	48	0.043924	57
IRF1	0	47	0.0128762	62
E2F8	0	46	0.348717	26
CEBPB	0.00143399	45	0.37899	22
EWSR1	0.00285545	44	0.439609	19
NR2F2	0.00293656	43	0.0741311	52
BHLHE40	0.00397652	42	0.197417	38
RUNX1	0.00429988	41	0.328402	29
ATF7	0.00761197	40	0.122659	42
EGR1	0.00938589	39	0.375809	23
PKNOX1	0.0109458	38	0.522069	16
SRF	0.0126306	37	0.843279	8
MYBL2	0.0142526	36	0.708918	11
SMAD2	0.014498	35	0.382565	20
ETS1	0.0145744	34	0.33293	27
USF2	0.0217074	33	0.254814	32
MEIS2	0.0329808	32	0.0999429	44
FOXK2	0.0339833	31	0.0784331	51
TAL1	0.0348607	30	0.10526	43
TCF7L2	0.0431007	29	0.149861	39
MGA	0.045528	28	0.217246	34
MEF2A	0.0714904	27	0.585396	14
NEUROD1	0.0870502	26	0.124734	41
MITF	0.0933934	25	0.0691933	53
NFIC	0.0944016	24	0.050691	56
STAT1	0.0951796	23	0.216061	35
TEAD4	0.0954102	22	0.240068	33
LEF1	0.123327	21	0.533098	15
NFYA	0.128885	20	0.131289	40
ATF4	0.134078	19	0.331768	28
ETV6	0.192942	18	0.382328	21
NR2F1	0.202951	17	0.287394	31
CREB3L1	0.245726	16	1.04796	2
NFYB	0.252568	15	0.375011	24
E2F1	0.265728	14	0.990398	4
MAX	0.376962	13	0.848941	7
NRF1	0.391142	12	0.348875	25
SREBF1	0.410851	11	0.510971	17
HMBOX1	0.422344	10	0.881961	5
NFATC3	0.472377	9	0.672401	13
E2F4	0.48186	8	0.808666	9
ZBTB33	0.491525	7	0.874161	6
ZNF143	0.560449	6	1.03361	3
YY1	0.57136	5	0.806757	10
ARNT	0.572827	4	0.67914	12
GABPA	0.628328	3	0.49131	18
THAP1	0.940543	2	0.0824531	49
ZNF384	0.959798	1	1.29589	1
