# Supplementary material for: Modeling Transcriptional Regulation Using Gene Regulatory Networks Based on Multi-Omics Data Sources
Source: Research Square preprint supplement (doi:10.21203/rs.3.rs-112300/v1), 2020-12-01
Supplement: Supplementary file 3 [file 72200e161544765de6e7fffb.xlsx]

## Sheet: S8A
hgnc_symbol	P_Value
MDC1	8.93881e-89
VRK3	1.40043e-82
ARHGEF11	1.89734e-77
POLR1A	1.4177e-72
MCMBP	2.04729e-64
HSPA1B	2.76134e-58
CHMP7	5.2989e-44
GMDS	1.9855e-39
MTIF2	1.7849e-38
TRIM38	2.8884e-36
FNTB	4.47776e-36
LYSMD2	1.91597e-34
TOP1MT	2.93469e-34
RND1	7.95625e-34
GTF3C5	9.05969e-34
CBR1	1.97097e-32
CD2BP2	1.67192e-30
RAD51	1.79801e-30
TPCN2	3.19691e-29
NT5C	1.28142e-28
PAQR4	6.76313e-28
ZNF277	8.16387e-28
POLE	1.41777e-26
ZNF776	5.70039e-26
TBC1D24	8.20819e-26
STRA13	1.07419e-24
SDHB	2.15746e-24
TMEM154	2.49124e-24
MCM2	4.39204e-24
GNB2L1	5.12672e-24
ZNF655	4.34911e-23
PPA2	2.39469e-22
MAN1B1	2.36622e-21
CPSF3	2.77854e-21
SH3BP5L	3.36317e-21
RNF167	1.35622e-20
ADI1	3.36985e-20
ZNF273	1.43073e-17
MICALL1	1.96775e-17
RRAD	2.49848e-17
C8orf76	3.97037e-17
INTS8	5.16152e-17
MTRR	1.87905e-16
NDRG1	2.26145e-16
RPL38	2.90718e-16
AGER	3.81796e-16
SMAD1	5.28698e-16
FAM167B	1.03766e-15
MRPS16	1.12372e-15
ACAD9	1.52785e-15
SCAMP5	1.6645e-15
PRDX3	1.88816e-15
HADHA	1.99519e-15
TM6SF1	2.66074e-15
TMEM115	4.08615e-15
FCGBP	5.04959e-15
NAGS	1.25227e-14
ALDH3B1	1.32085e-14
HECTD3	1.47478e-14
LRRFIP2	2.56421e-14
CSNK1D	2.74615e-14
SCAMP4	4.14021e-14
ZCWPW1	5.67492e-14
MCM3AP	8.87488e-14
ISCU	9.49342e-14
MIIP	2.13704e-13
CTSZ	2.32431e-13
BPHL	2.72879e-13
COMMD4	6.70075e-13
HHLA3	8.72205e-13
C7orf13	8.76373e-13
WDR54	9.13017e-13
DDX18	2.34103e-12
ARPC4	2.42918e-12
ACSS1	2.79055e-12
NMNAT1	6.03866e-12
BCAS2	6.96768e-12
MED13	7.26617e-12
WDR74	8.59549e-12
C14orf159	1.54027e-11
TDP1	1.78999e-11
KCNJ15	1.8591e-11
UBE3C	1.91075e-11
CASKIN2	1.9781e-11
TRIM62	2.41124e-11
MRI1	2.46068e-11
AGA	3.09424e-11
CMTM7	5.31553e-11
RPL29	9.72582e-11
SH3BP1	1.00051e-10
ELOF1	1.05567e-10
NUDT1	1.14909e-10
DEF6	1.24596e-10
TRIB3	1.25048e-10
ARHGEF17	1.41315e-10
ARSA	1.6353e-10
HCST	2.08288e-10
SLC45A4	2.16231e-10
TCF19	2.52305e-10
STX7	2.58808e-10
TMEM180	2.80594e-10
DERA	3.22361e-10
RNF170	3.34933e-10
AFMID	3.48609e-10
LYSMD1	3.87864e-10
DDX19A	8.3708e-10
MGAT1	8.41244e-10
HLA-DPB2	9.10634e-10
HIST1H3E	1.90926e-09
ADA	1.99865e-09
MTERFD2	3.49162e-09
FOXRED1	5.1317e-09
MVD	7.74221e-09
MRP63	7.9402e-09
ANXA7	8.41726e-09
CBLN3	9.39441e-09
C9orf89	1.01709e-08
TFAM	1.07933e-08
RFC5	1.24431e-08
TMED3	1.33111e-08
GPR125	2.09105e-08
ZNF16	2.30913e-08
CDK18	2.53261e-08
PGM1	3.45282e-08
RIC3	4.19466e-08
LRRC45	4.54796e-08
FAM24B	4.68029e-08
CXXC5	5.2808e-08
NOP10	5.38489e-08
SLC25A15	5.84471e-08
GRAMD1C	6.4452e-08
ARRB2	7.12095e-08
TNKS	7.58335e-08
ZNF619	7.86743e-08
LY75	7.99411e-08
FGF11	8.24911e-08
RAB7L1	9.01569e-08
SEC61A2	9.40221e-08
ATR	9.58256e-08
MICAL1	1.11287e-07
ZFAND2A	1.13339e-07
HCG11	1.46278e-07
GPATCH2	1.50071e-07
TMCO4	1.59434e-07
TYW1B	1.59926e-07
HIST1H2BD	1.64897e-07
NUP214	1.97462e-07
RNASEK	2.19198e-07
ZBTB3	2.28724e-07
SLC39A4	2.29398e-07
GTF2I	2.39473e-07
PBX2	2.40712e-07
LRRC37BP1	2.52611e-07
PSKH1	2.54073e-07
EIF2AK3	2.63701e-07
ENDOG	2.72318e-07
LOXL3	2.91416e-07
C6orf47	3.07736e-07
HSPA1A	3.50947e-07
ZNF436	3.72102e-07
KIAA1598	3.81269e-07
CD96	3.92315e-07
PARP14	4.54882e-07
PQLC1	4.80679e-07
ARFGAP1	5.0028e-07
ULK4	5.01773e-07
ADORA2B	5.05776e-07
CCNG1	5.08408e-07
CC2D2A	5.20743e-07
EIF4A1	6.1095e-07
POT1	6.2683e-07
UPK3B	6.36413e-07
C6orf48	6.69788e-07
MRPS11	6.87048e-07
GLOD4	7.33879e-07
TIAM1	7.46248e-07
FAM168A	7.83225e-07
STOX1	7.87561e-07
FNBP1	8.53439e-07
UBLCP1	8.61197e-07
LZTR1	8.72672e-07
DOK1	8.9829e-07
NICN1	9.03578e-07
CBX7	1.01855e-06
ADPRH	1.02394e-06
C18orf54	1.03695e-06
KCNC3	1.04719e-06
PASK	1.08401e-06
CD180	1.09052e-06
EFHC1	1.11012e-06
TRIM14	1.16614e-06
RPF1	1.17908e-06
ZNF672	1.29595e-06
SLC6A12	1.29884e-06
PVRL2	1.34846e-06
PPIL3	1.3694e-06
MAST3	1.42819e-06
PSMB8	1.47625e-06
EMG1	1.52977e-06
HERC6	1.5322e-06
ABT1	1.55766e-06
SIGLEC16	1.63355e-06
PAXIP1	1.6396e-06
FPGS	1.64663e-06
BSCL2	1.69622e-06
NQO1	1.7112e-06
DNM1P35	1.79273e-06
MAPK3	1.97874e-06
GPR35	2.18261e-06
MPZ	2.19877e-06
NME7	2.22158e-06
SHMT1	2.37668e-06
NDUFB6	2.4218e-06
COPA	2.43476e-06
CNTNAP1	2.48833e-06
MFF	2.62794e-06
GRM2	2.6713e-06
SGPP1	2.73528e-06
ENO2	2.76561e-06
KLHDC7B	2.89855e-06
RAB8A	2.98268e-06
ZDHHC24	3.01781e-06
P2RX4	3.15555e-06
PCNT	3.32473e-06
C8orf33	3.63706e-06
TMOD2	3.65624e-06
NT5M	3.72912e-06
ZNF18	3.82742e-06
LNPEP	3.84994e-06
PIGN	3.89575e-06
LAMA5	3.98092e-06
CNPY2	4.22511e-06
PPP1R3G	4.24602e-06
SLCO4A1	4.46106e-06
NFRKB	4.4858e-06
DCTN5	4.51243e-06
STMN1	4.72579e-06
MED19	5.02331e-06
RBBP8	5.09025e-06
UCP3	5.2821e-06
FARP1	5.36308e-06
BCAR1	5.40495e-06
HCK	5.44722e-06
GRWD1	5.62265e-06
SLC16A11	5.62983e-06
CTSW	5.92019e-06
PKIA	6.01073e-06
IFNAR1	6.05574e-06
MAF1	6.1942e-06
HEXA	6.35462e-06
PHPT1	6.37651e-06
ERMP1	6.54223e-06
C9orf114	7.05636e-06
SMPD2	7.13129e-06
DAK	7.14431e-06
C17orf89	7.36605e-06
PPP2R1A	7.93941e-06
PVRL1	7.96854e-06
HYI	8.47347e-06
RANBP3	8.67209e-06
LRRC29	8.86101e-06
GTF2H1	1.02012e-05
CLTCL1	1.03538e-05
NAPRT1	1.09624e-05
RBM43	1.10435e-05
UPB1	1.11264e-05
SCNM1	1.13999e-05
ZNF514	1.1846e-05
DIRAS1	1.31269e-05
BCL2L12	1.31611e-05
SBDS	1.3285e-05
MINK1	1.33174e-05
GPM6A	1.42364e-05
CNTD1	1.43279e-05
ARNTL	1.44471e-05
WARS	1.4522e-05
MRPS7	1.48405e-05
RNF32	1.52504e-05
PLCH2	1.55854e-05
PKD2	1.55867e-05
RPL8	1.68223e-05
ZNF763	1.7091e-05
GAMT	1.72692e-05
ATPAF2	1.75448e-05
TRIM27	1.78047e-05
ESPN	1.87922e-05
KIF3C	1.9314e-05
LMO4	1.93471e-05
NT5DC2	1.94874e-05
SHF	2.01605e-05
GCC2	2.04118e-05
OGG1	2.06789e-05
AMN1	2.07399e-05
ITPR3	2.15736e-05
SCO2	2.16581e-05
PIK3R3	2.23414e-05
RHOA	2.37614e-05
INVS	2.62462e-05
PCK2	2.77923e-05
SCNN1D	2.81015e-05
CRIP3	2.88958e-05
FAM149A	2.95471e-05
SLC27A4	2.98525e-05
ZNF532	2.98588e-05
SLC19A1	3.18629e-05
RDH5	3.18651e-05
SEC14L1	3.19752e-05
B3GALT2	3.25818e-05
ATG16L2	3.30745e-05
TRPV1	3.32485e-05
IMP4	3.42271e-05
TMEM106A	3.44351e-05
ATG4D	3.44839e-05
MORN2	3.72934e-05
VASP	3.73548e-05
EFCAB4A	3.77858e-05
PRKD2	3.81581e-05
SIVA1	3.8711e-05
TUBGCP5	3.96754e-05
DNAJC21	4.10511e-05
CDHR5	4.13814e-05
PTGES2	4.15155e-05
KCTD21	4.2217e-05
RAB27A	4.24993e-05
MAGEF1	4.25855e-05
MYL6B	4.36529e-05
PMAIP1	4.38833e-05
SFXN4	4.45677e-05
TNFAIP8L2	4.66907e-05
MZT2A	4.75411e-05
BLOC1S1	4.81855e-05
BRF1	4.81952e-05
SEL1L3	4.86311e-05
ADCY5	4.92224e-05
POLR3GL	4.93265e-05
GDE1	4.95963e-05
CCS	5.00653e-05
COPS8	5.02188e-05
DAPP1	5.14358e-05
SERAC1	5.1873e-05
MEN1	5.25419e-05
ACD	5.30578e-05
TTLL7	5.32472e-05
PHTF1	5.32854e-05
SOX12	5.46778e-05
KDM1A	5.50086e-05
MEPCE	5.53556e-05
ALS2	5.60973e-05
CHD6	5.69051e-05
ARL4A	5.70436e-05
MYO9A	5.97189e-05
FHOD1	6.00401e-05
RALY	6.03794e-05
ZNF343	6.1612e-05
BCAT2	6.26829e-05
TMBIM4	6.30512e-05
COTL1	6.3115e-05
ABCC3	6.35506e-05
CATSPERG	6.43936e-05
NCR3	6.64051e-05
RASSF6	6.6436e-05
KCNN4	6.7694e-05
QSOX1	6.84579e-05
CCDC115	6.96725e-05
KLHL22	7.01379e-05
LRRC58	7.01509e-05
RWDD2A	7.15472e-05
TMEM102	7.16452e-05
CLEC2D	7.21282e-05
SNX32	7.2149e-05
ZNF718	7.24509e-05
HSPA1L	7.25142e-05
ODF2L	7.37951e-05
RPL28	7.4048e-05
ALDH2	7.48218e-05
CECR1	7.79179e-05
EIF4A3	7.79846e-05
ATP5G2	7.94633e-05
CDS2	8.05111e-05
TBC1D14	8.33089e-05
HIST1H2AE	8.57654e-05
FAM111A	8.72494e-05
ZNF24	9.22273e-05
HLA-DMB	9.25962e-05
SLC2A11	9.42642e-05
AURKB	9.47908e-05
CARKD	9.57722e-05
COX18	9.61808e-05
ICMT	9.62862e-05
PITPNM1	9.84137e-05
ING4	9.85852e-05
PIN1	0.000101994
RAB11FIP3	0.000102832
RHPN1	0.000104075
TFB1M	0.000105093
KIAA1875	0.000106138
GLYR1	0.000111802
CCT8	0.000118446
VPS13B	0.00012013
ZC3H10	0.000121764
ZNF211	0.000123719
B4GALT7	0.000124361
DTNBP1	0.000124393
SLC16A13	0.000124817
EXOC2	0.000125448
SERPINB10	0.000126074
SHISA4	0.000126447
ADK	0.00012658
PNKP	0.000127633
WDR90	0.000133498
HPS6	0.000133505
GGA3	0.000136401
ENO3	0.000139551
HDLBP	0.000140521
RNF141	0.000140849
MAPRE2	0.000141813
GSTK1	0.000145034
NFKBIL1	0.000146348
GAS2L1	0.000155703
UNG	0.000156199
TSEN2	0.000157403
UBAP2	0.000159756
POM121C	0.000160921
PPP1R12C	0.000162509
C1orf228	0.000168941
CD151	0.000169013
NUDT13	0.000171378
MBOAT4	0.00017146
PSMA3	0.000171657
GALNT1	0.000175778
DPH3	0.000176315
TOX	0.000181131
CCDC102A	0.000183062
EFNA5	0.000183113
HLX	0.000183537
PALB2	0.000185524
BAG2	0.000189608
SLC12A6	0.000190987
STAG3L2	0.000196473
NCOA7	0.000200102
RNF212	0.000202198
CDH23	0.000205513
PVRIG	0.000208094
ZNF562	0.000208437
ADRBK2	0.000209033
SPIRE2	0.00021483
SERPINB9	0.000215494
NUB1	0.000216632
ARL11	0.000223134
ZBTB39	0.000223821
IL24	0.000226094
HSP90B1	0.000227065
FXR2	0.000227754
TSSC1	0.000227893
TRIM7	0.000231286
TXNL4B	0.000232585
KIAA0391	0.00023924
ZNF701	0.000247049
NUP43	0.000247672
FAM118B	0.000254077
DOCK6	0.000256338
UBIAD1	0.000257553
PPDPF	0.000257948
LHPP	0.000258573
GNMT	0.000259209
MYOT	0.000259964
SPATA13	0.000271155
CKAP5	0.00027246
TMEM30A	0.000272999
NEDD4	0.000275168
WFIKKN1	0.000275764
PON2	0.000277134
PRG2	0.000277217
GARNL3	0.000277963
BTBD9	0.000283295
KIFC2	0.000283326
CANT1	0.000285318
WDR41	0.000285555
EIF1B	0.000289298
PTGIR	0.000291279
LRRC28	0.000292434
ZNF45	0.000292876
TXLNA	0.000294608
ASNSD1	0.000296124
ZNF440	0.000299295
DEAF1	0.000301324
PLEKHH3	0.000303896
C8orf31	0.000306294
TIMM44	0.000306982
ESYT2	0.000308687
SLC31A1	0.000308971
DARS	0.000309031
BBS2	0.000309253
CARD14	0.000312079
PRR22	0.000314761
PIP5KL1	0.000318379
ALOX12	0.00031954
RPL14	0.00032452
TTLL3	0.000332977
NME6	0.000349493
TMPO	0.00035465
RPL34	0.000356256
DCXR	0.000356356
BIVM	0.000357489
THOP1	0.0003614
SLC24A4	0.000364249
TXNDC15	0.000371684
WFDC3	0.000375614
RTN2	0.000376734
ZNF142	0.000379091
TTC12	0.000379431
CPSF2	0.000379435
ILKAP	0.000388405
SNX5	0.000392563
KRT81	0.00039348
FAIM3	0.00039789
MEX3D	0.000408287
BTLA	0.000410003
RAI1	0.000411777
DNAJC1	0.000413875
PLCB3	0.000418887
GSDMD	0.000431563
EPN2	0.000442613
DUOX1	0.000443014
QSER1	0.000443402
POLR3K	0.000443478
ZNF253	0.000444254
RPS28	0.000447714
WDR18	0.000448715
WWP2	0.000449632
CERCAM	0.000461866
UHRF1BP1	0.00046658
GPX4	0.000472286
DAD1	0.000473768
BLVRA	0.000475863
PLEKHG5	0.000482842
NMI	0.000484124
POLM	0.000484748
GART	0.000492393
STX1A	0.000499205
PLCD3	0.000510983
RFFL	0.000511558
AAGAB	0.000514241
ZNF174	0.000523057
SLC23A3	0.000535397
GATM	0.000540262
SIRT3	0.000540352
TK2	0.000543171
TMEM66	0.000546728
IRF6	0.000547755
CARS2	0.0005516
AP4M1	0.000557543
NDUFS8	0.000558195
E2F3	0.000566812
AIF1	0.000567895
SUPV3L1	0.000568052
ABCB9	0.000571985
VPS16	0.000576442
PRUNE2	0.000579329
MSH6	0.000579412
NSUN6	0.000582294
ZNF410	0.000589125
KLRK1	0.000594348
DHX58	0.000598229
ZW10	0.00060638
LIMD1	0.000612128
EBI3	0.000612822
GPR56	0.000620018
MSTO2P	0.000628511
SH3RF3	0.000632765
SP140L	0.000637615
CCDC17	0.00064587
EGFL7	0.000646235
SBNO1	0.000651613
COL18A1	0.000662328
YIPF5	0.000664708
SNX21	0.000667758
PPARA	0.00067544
TMBIM1	0.000677433
CEACAM21	0.000679439
GPHN	0.00068152
SSBP4	0.000691878
PTPMT1	0.00070207
UROD	0.000705335
PCBP3	0.000712644
MUTYH	0.000712786
USP33	0.00072852
DCAKD	0.000728851
SGTA	0.000734773
TPMT	0.000737113
GALK1	0.000740775
FADD	0.000752655
USP20	0.00075815
SOX30	0.000800275
HLA-F	0.000812905
PTK2	0.000836251
CD53	0.000841258
SPOPL	0.000848324
HGF	0.000852643
PDCD2L	0.000853427
SLC39A3	0.000855287
C4orf21	0.000860866
DNAJB6	0.000873269
FAM114A1	0.000877842
TWISTNB	0.000901095
SSNA1	0.000911663
MPND	0.000911716
SNRNP25	0.000912373
PEX19	0.000917592
PSMD13	0.000918461
TNFAIP8	0.000929097
FBF1	0.000929317
RASSF2	0.000932174
TTC22	0.000939071
C17orf62	0.000940148
TP53I13	0.000940164
RPL12	0.00094334
ODF3B	0.000945873
CEACAM1	0.000966014
SLAIN1	0.000969063
TLE4	0.000972086
CACNA2D4	0.000974041
DNAJA2	0.000980291
SLC22A15	0.00100338
NPAT	0.0010062
CNBP	0.00101037
ITPKC	0.00103043
GSTZ1	0.00103577
ESYT1	0.00103767
MGA	0.00103782
ZNF772	0.00104432
NEAT1	0.00104727
LMF2	0.00104802
WDR82	0.0010497
LRP10	0.00105299
POLI	0.00105425
SDR42E1	0.00106607
WDR25	0.00106792
SH2D2A	0.00108206
TMC4	0.00108259
SERPINB6	0.00108905
SUFU	0.00109144
FLT4	0.00110673
TRIM5	0.00111845
AHCY	0.00113876
C14orf132	0.00114079
GLYCTK	0.00114126
SUV420H2	0.00114297
STXBP1	0.00114944
TEX264	0.0011571
SHPK	0.00118006
PIP4K2B	0.00118502
C11orf82	0.00119389
RUSC2	0.00119752
AGPAT4	0.00120087
DSCC1	0.00121375
NOP56	0.00123435
DHX16	0.00123605
IER3	0.00123993
GCHFR	0.00124374
C6orf52	0.00126877
MOCS1	0.00127056
ADAL	0.00127362
PLEKHO2	0.00128194
EPB41L5	0.00128199
COG6	0.00128204
GGA2	0.00128973
ATP8B2	0.00129449
ABHD12	0.00129566
ZP3	0.0012966
C5orf28	0.00129689
ARHGAP19	0.0013045
APOBEC3B	0.00130603
NFKBID	0.00132377
MYO1E	0.00132842
C5orf24	0.0013286
RNF112	0.00133174
INADL	0.0013324
LDHB	0.00133942
SQLE	0.00134781
PSMB5	0.0013495
SPCS3	0.00136271
INPPL1	0.00136356
LSP1	0.00137477
GAL3ST4	0.0013762
DAP	0.0013841
DOCK9	0.00139522
ALG12	0.00140176
TLR6	0.00140297
NHEJ1	0.00140854
RNH1	0.00141706
SLC25A41	0.0014208
MDP1	0.00144175
TFG	0.00145854
FAM160A2	0.00146051
SIK2	0.00149245
PLEKHB2	0.00149517
PCMTD1	0.0014956
LCMT2	0.00152418
SGCE	0.00152698
PIK3R5	0.00156248
TRAF3IP3	0.00161804
ZNF205	0.00162173
PGM2L1	0.00162745
IL4	0.00163335
KIF1C	0.00164005
NINJ2	0.00164478
HPS1	0.00165115
SDF4	0.00166016
C16orf13	0.0016622
ATP6AP1L	0.00166721
RPL21	0.00167487
TESK2	0.00169069
NCAPH2	0.00170039
TMTC2	0.00171044
DENND1A	0.00173932
SPSB2	0.00174423
TIGD6	0.00174506
KLC2	0.00174773
FAM159A	0.00175893
MND1	0.00175983
VPREB3	0.00177195
PDZD7	0.00177716
NCK2	0.00179312
C19orf10	0.00180431
CLN6	0.00181431
IQCD	0.0018155
INTS4	0.00184544
CCDC106	0.00184836
EIF6	0.00185332
TCFL5	0.00185395
SRSF6	0.00186056
ZNF561	0.00186816
MAP2K3	0.00187142
DFNB31	0.00190069
LPAR2	0.00190485
PRPF31	0.0019136
NFE2L3	0.00191377
SLC26A1	0.00191883
PTK6	0.00195608
FEM1A	0.00196557
KCTD1	0.00196642
GAA	0.00197159
FTH1P3	0.00198707
C10orf10	0.00198861
PSMD6	0.00199549
SLC25A1	0.00199827
RAB6B	0.00200706
RPS20	0.00200811
SIDT1	0.002009
TRAPPC2L	0.00202077
PCCB	0.00203985
STRC	0.00206317
ULK1	0.00207997
C14orf1	0.00208736
DNAJB5	0.00208899
SLC41A1	0.00208927
HAUS8	0.00209776
TTC37	0.0021036
TRIM66	0.0021101
FLYWCH1	0.00212759
GRK5	0.00213184
CDK5R1	0.00214557
IKBKE	0.00215443
HN1	0.00216742
R3HCC1	0.00217479
C20orf196	0.00219877
C3orf14	0.00222373
PSMB4	0.00222609
TAGLN2	0.00224163
KCNJ14	0.00224847
GEN1	0.00224896
AASS	0.00224966
ARCN1	0.00225009
GALNT2	0.00225653
PWP2	0.00225689
HEY2	0.00225945
C4orf27	0.00228431
DGAT1	0.00231986
NR1H2	0.0023342
HSPB1	0.00233951
NFATC3	0.00234214
C22orf46	0.00235782
ITM2C	0.00236278
NLK	0.00236878
ADHFE1	0.00237207
SRM	0.00237675
LTA4H	0.0023828
ZWINT	0.00238508
PTPLAD1	0.00240361
CAT	0.00241192
ST20	0.00243047
ZNF137P	0.0024427
PYCR1	0.00244727
TMEM134	0.00244949
HIPK3	0.00250344
SNAI3	0.00251237
LTC4S	0.00252252
HSD17B14	0.00253925
DYNLT1	0.00255357
GIGYF1	0.00255383
ANO10	0.00256886
LENG9	0.00258126
C7orf49	0.00258546
GPR137B	0.00261845
FAM63A	0.00267386
GSTP1	0.00267813
NOL9	0.00268185
CD300LB	0.00269874
TMEM119	0.002702
CTSH	0.00270587
PMS2P4	0.00273006
ZNF438	0.00275293
SORBS2	0.00275375
TYK2	0.0028052
ADAMTSL5	0.00280613
TFAP2E	0.00282095
ARHGAP22	0.00284351
ORAI2	0.00285016
SEC61A1	0.00287611
VMAC	0.00287779
ITGA6	0.00289488
RAB3GAP2	0.00291861
DACT3	0.00292686
TBKBP1	0.00292711
SUMO3	0.00293282
UAP1L1	0.00294495
C11orf35	0.0029502
LRRC61	0.00297406
C16orf62	0.00300036
ICAM5	0.00300441
SRA1	0.00301236
MTHFD2L	0.00302611
PTOV1	0.0030696
NCOR1	0.00308017
AGL	0.00308722
DDR1	0.00309372
UAP1	0.00311867
C1QTNF4	0.00314791
UNC13D	0.00316036
TADA3	0.00317721
C2orf43	0.00318517
NME3	0.00318626
CD55	0.00321074
ANAPC16	0.00324914
BIN1	0.00326334
PCGF6	0.00327626
IL10RA	0.00329082
DMPK	0.00329113
HYAL3	0.00329899
DUSP3	0.00333127
RAP1GDS1	0.0033355
CSPP1	0.00333976
CDR2	0.00334388
EP400NL	0.00335273
MS4A6A	0.00336057
GPAA1	0.00336821
SRRD	0.00337103
CCDC77	0.00338683
ELMO3	0.0033938
TMC8	0.00341441
ALPL	0.0034226
THBD	0.00342714
IFI30	0.00344259
C2CD2L	0.00347404
GAPDH	0.00347448
PDCD5	0.00347941
CXCL16	0.00347984
FMNL2	0.00348859
AK4	0.00349348
DGUOK	0.00349418
CD101	0.0034978
CA13	0.00350342
PDLIM1	0.00350474
TBC1D10C	0.00351901
RHOBTB1	0.00351938
PLAUR	0.00352649
SLC38A7	0.00353097
EIF4E3	0.0035363
ERAP1	0.00354075
HAVCR2	0.00354273
CDK5RAP3	0.00356773
ENDOD1	0.00358553
IRF7	0.00358847
SAT2	0.00359041
ATP5SL	0.00362591
MCCC1	0.00364891
SCD5	0.0036537
CASP1	0.00366347
KCNAB1	0.00366767
TRIM41	0.00367929
AFF4	0.00368751
TNK1	0.00373129
QPRT	0.00374982
ADAT1	0.0037839
MAN1C1	0.00378499
GANAB	0.00381173
SEC23A	0.00382217
NDUFA11	0.00382283
FYB	0.0038554
KTN1	0.00386462
MCC	0.00386649
ACYP2	0.0038668
SYK	0.00389139
ST6GALNAC3	0.0038976
VN1R1	0.0039019
ALOX5AP	0.00392014
MED20	0.00392633
SARS	0.00395697
USP54	0.00396439
WDR75	0.00400124
ATP10D	0.00402294
TRIM39	0.00402419
UNC5B	0.00403645
2020-03-08	0.00403923
DCLRE1C	0.00405575
IFNAR2	0.00409667
CHMP4B	0.00410969
SNX17	0.00411068
SURF6	0.00411297
VPS8	0.00411541
TPRA1	0.00413101
CIITA	0.004136
ZNF823	0.00415573
MKRN2	0.00419023
GDF9	0.00419095
BCAP29	0.00420331
GNB5	0.00423938
RNF11	0.00423943
ZRANB3	0.00425644
PLK1	0.00425655
FAM71E1	0.00426907
PPP2R4	0.00429443
TIGD2	0.00429867
IQSEC1	0.00433335
CEP97	0.00433469
MTMR12	0.0043547
NLRC5	0.00437057
SLC22A17	0.00439426
ROGDI	0.0043943
BAG5	0.00441583
EHBP1	0.00444144
NIPSNAP1	0.00446548
HKDC1	0.00449175
RSRC1	0.00449835
MICB	0.00451318
DUS3L	0.00451938
C12orf49	0.0045202
NPHP4	0.0045294
DCAF5	0.00454754
XAB2	0.00454825
ESD	0.0045516
COL4A3	0.00457403
E2F5	0.00458586
AIM2	0.00458937
NHP2L1	0.00460327
APOL3	0.00461976
TTI1	0.00462854
C3orf52	0.00463157
PPIA	0.00464036
ZFAND2B	0.00468811
WBSCR16	0.00470007
TNKS2	0.00472901
MFSD10	0.00473282
CACNA1E	0.004753
HPS3	0.00478138
SNTB2	0.00479205
CASC4	0.00482425
GGA1	0.00483216
TMX4	0.00484697
N6AMT2	0.00490015
IL12RB1	0.00490565
SLC7A7	0.00490713
EMILIN2	0.00491123
SDC3	0.00491587
RFXAP	0.00494395
AXIN2	0.00494684
FAM105B	0.00497882
ACSL3	0.0049881
PEMT	0.00499861
ZFYVE27	0.00502044
UMPS	0.00503963
NSD1	0.00505387
RAPGEF1	0.00505529
PUM2	0.00506281
LGALS9	0.00507451
COMTD1	0.00507625
FAHD1	0.00508331
SYNRG	0.00511607
PAPLN	0.00514068
CYP4F3	0.00520835
GABBR1	0.00520978
STEAP3	0.00521284
SEMA4F	0.00521499
REPIN1	0.00521845
C22orf34	0.00524988
CTDNEP1	0.00525503
LIG1	0.00534038
UTP14C	0.00535513
MTMR9	0.00536761
SKP1	0.00537145
TCN2	0.00538482
SNHG9	0.00538504
WDR62	0.00540156
ZNF264	0.00544196
OPLAH	0.00545158
FBXW8	0.00547135
PDCD6	0.00551381
CCR10	0.00551748
C2orf88	0.00554027
RAD21	0.00556302
CDCA7	0.00557042
SLC4A1AP	0.0056086
MNAT1	0.00563198
NCSTN	0.00564797
C17orf59	0.00564877
OXER1	0.00567362
VARS2	0.00568416
CTSO	0.00569791
MAPRE3	0.00572201
NEIL1	0.00573505
ZFPL1	0.00573746
LILRA2	0.00573978
SRF	0.00574005
ROR2	0.00574132
NDOR1	0.00574509
SNX6	0.00575749
FGFR1	0.00577335
VNN2	0.00580945
FAM167A	0.00581104
SPG21	0.00585447
ZMAT3	0.00586509
TBCB	0.00587363
MLST8	0.00587405
PPP2R5C	0.00589023
CPNE8	0.00590166
HADHB	0.00592824
ICOS	0.00593694
GMFG	0.00595078
MDFIC	0.00596064
GOT2	0.00596155
SRP14	0.00602181
SRR	0.00604747
CCDC28B	0.00606572
PIGM	0.00607633
CCDC41	0.00610665
NCAPD2	0.00611325
CRK	0.00614308
ADAT3	0.00619264
PCOLCE	0.00622042
SERTAD3	0.00622435
TBC1D1	0.00622658
GRAMD4	0.00625077
JAK2	0.00625701
LPAR5	0.00625725
IGF2R	0.00626603
ZFHX2	0.00632169
C5	0.00634047
DPM2	0.00634162
HLA-DOB	0.00638312
TPD52	0.00638474
TMEM80	0.00639492
C14orf166	0.00643065
MYO6	0.00647705
CAPN1	0.0065534
CCDC146	0.006562
UTP11L	0.00656833
SACS	0.00658547
PXMP4	0.00658844
ZNF652	0.00662965
CYP4F12	0.00663004
FOXN2	0.0066496
PARP16	0.00666893
ANKRA2	0.00667938
CCDC57	0.00668945
ZNF616	0.00669435
ATXN7L3B	0.00669621
INTS5	0.0066978
PARP15	0.00670355
ITCH	0.00671146
RFX2	0.00671386
CUZD1	0.00674399
MT1F	0.00674645
ZNF746	0.00674646
ASB1	0.00675973
CDC45	0.00677403
ANK1	0.00677929
NR3C1	0.00678397
CD37	0.00679754
NEK8	0.00680493
SS18L1	0.00681111
RPS10	0.00684723
DENND2D	0.00685676
WNT6	0.00685765
ENTPD2	0.00691119
NSUN2	0.00691366
NANOS3	0.00692259
HPS5	0.00694178
DENND4A	0.00695207
TLR10	0.00695246
SERINC1	0.0069773
SMU1	0.00698977
TMEM8A	0.00699764
KCTD10	0.00701328
SIGLEC10	0.00702779
CPNE1	0.00704887
COL6A2	0.00706772
EID2	0.00707276
SNRPB	0.00707808
CSRNP1	0.00708757
ASXL1	0.00708787
ATP13A3	0.00712145
CHCHD3	0.00712996
AMFR	0.00713192
NEK9	0.00714875
2020-09-11	0.00715068
GIPC1	0.00722112
ABLIM3	0.00723072
TNFRSF18	0.00724505
PCBD1	0.00728638
ETV7	0.00729425
FIBP	0.00733606
TSC22D1	0.00735606
CCNF	0.00740257
PIK3AP1	0.0074085
FAM162A	0.00741361
APITD1	0.00744066
CD9	0.00747215
ZFYVE19	0.00747748
IFIT1B	0.00751207
TP53TG1	0.00752097
KIAA0513	0.00752098
HCLS1	0.00754441
MLLT6	0.00755091
GRHPR	0.00756406
SLAMF8	0.0076123
PPAT	0.00761732
NFYC	0.00762424
BAI2	0.00770814
RNF187	0.0077536
RNF216	0.00776113
CCDC64B	0.00780586
CDK9	0.00781472
FKBP4	0.00782897
SNX25	0.00782986
RFC1	0.00785537
KIAA0040	0.00788153
ELMOD3	0.00790766
UBE2R2	0.00793423
GRASP	0.00795134
PVT1	0.0079709
IPO8	0.00799335
PCYT2	0.00799805
BRAP	0.00800518
CENPP	0.00800718
TMOD4	0.00802448
CABP1	0.00803922
MAT2B	0.00804562
UBE2Q2	0.00806515
GPI	0.00808499
MYO5A	0.00811009
UBE2E3	0.00811454
MYO1C	0.00816071
CHAC2	0.00816163
SEMA3B	0.00816857
COG4	0.00819316
PTPN18	0.00820299
NDUFV1	0.00822789
2020-09-09	0.00824318
C5orf55	0.00824365
ZRANB2	0.00824607
ZNF584	0.00824998
PCP2	0.00826507
ANKRD22	0.00831935
SYS1	0.00833832
C15orf52	0.00833902
MPV17L2	0.00835962
CSTB	0.0083874
SLC25A29	0.00840998
RECQL5	0.00846377
RAB32	0.00848665
ZNF547	0.00850255
RERE	0.00850283
SLC2A4RG	0.00850968
STX8	0.00852057
HCG18	0.00855783
SORL1	0.00865177
ZGPAT	0.00866408
GSTM4	0.00866898
DHX34	0.00867737
GHRLOS	0.00868493
RABL3	0.00868809
DHX57	0.00869544
NPW	0.00873886
NAGPA	0.00874605
RSAD1	0.00876896
GLS	0.008777
LRRCC1	0.00878927
RPE	0.00888791
BCDIN3D	0.00890319
RANGRF	0.00891286
ZC3HAV1L	0.00897329
HLA-DQA1	0.00901326
NFKBIE	0.00907778
PNPLA6	0.0090789
ATMIN	0.00911481
CMKLR1	0.00915126
ST8SIA4	0.00915408
SNX7	0.00926811
MAN2C1	0.00930081
DHODH	0.00930151
QPCTL	0.0093027
PGLS	0.00936526
TSSK6	0.00937802
ZBTB43	0.00939769
FBRSL1	0.00941216
LRFN4	0.00941833
ACTL6A	0.00942518
DPP9	0.00947319
ZSCAN30	0.00949812
PDIA6	0.00950633
MERTK	0.00951231
KCNK7	0.00957244
C4orf48	0.00960352
ARRDC2	0.00960568
C21orf91	0.00961723
USP31	0.00962001
ARRB1	0.00962924
MAPK8IP1	0.00970641
NPDC1	0.00973286
LRPPRC	0.00974129
TRPM2	0.00976273
SP1	0.00985837
PIAS4	0.00986118
ARFIP1	0.00987737
POLR2I	0.0099183
CLIP2	0.00995693
GMEB2	0.00996363
COPG2	0.00996927
DNAH1	0.00998073
DMXL2	0.0100113
CRAT	0.0100197
DRG2	0.0100517
SFXN3	0.0100624
INTS1	0.0100654
SLC16A3	0.0100659
SNTB1	0.0101209
CLEC17A	0.0101674
IDH1	0.0102138
PRR5L	0.0102343
ARSG	0.0102824
HAGH	0.010307
HEATR5B	0.0103362
MRTO4	0.0103476
STAP1	0.0103516
DIXDC1	0.0103999
FUT8	0.0104274
TMEM140	0.0104327
ISYNA1	0.0104718
DYRK4	0.0105003
SDR39U1	0.0105176
PAQR6	0.0105887
C3orf38	0.0106843
TELO2	0.0107565
MLLT11	0.0107644
KIAA0226	0.0107908
BRD2	0.0108562
ZNF497	0.0108635
COPZ2	0.010983
ADD3	0.0109833
GSTO1	0.0109837
OSCAR	0.0109845
CHIT1	0.01103
CRYL1	0.0110409
PNPO	0.0110432
IL7R	0.0111768
CARD16	0.0112015
STK16	0.0112147
SSC5D	0.0112164
KRI1	0.0112244
RYR3	0.0112946
ADD2	0.0113157
DHRS9	0.011363
RCHY1	0.0114104
SLC30A5	0.0114771
COQ5	0.0114803
ARL6	0.0114913
SEC31B	0.0115392
RASA1	0.0115445
RNF220	0.0115573
NUP205	0.0115648
ATXN10	0.0115821
ACAD11	0.0115844
NAP1L1	0.0115907
SCYL2	0.011606
PAK1	0.0116075
HPCAL4	0.0116555
TMEM221	0.0116852
MYOM1	0.0117187
EFCAB4B	0.0117255
TADA2A	0.0117443
NUCB2	0.0117818
CACNA1A	0.0118224
H1F0	0.0118553
CRTAM	0.0118567
NKTR	0.0118778
PARP6	0.0118873
ATP6V0C	0.011909
POLH	0.0119226
GORAB	0.0119259
C21orf2	0.0119327
LYPLA2P1	0.012039
MICAL3	0.0120756
ACOT13	0.0120822
NT5C2	0.0120828
SNHG1	0.0121337
COX16	0.0121359
MRPL12	0.0121457
STX10	0.0121899
FHDC1	0.0121909
EHD1	0.0121995
AGPAT6	0.0122023
BIRC7	0.0122057
ABCB6	0.0122329
C19orf24	0.0122787
RTEL1	0.0122902
SIGLEC11	0.0123202
CEP55	0.012345
GPR65	0.0123531
ADAM8	0.0123794
MAFK	0.0124
KIAA2013	0.0124039
TCEA3	0.0124171
SH3BGRL3	0.0124436
GPSM1	0.0124488
ATP1B1	0.0124568
AACS	0.0124685
SNX1	0.0124809
ASB13	0.0124818
AP3B2	0.0125578
PFKFB4	0.0125698
ITGA3	0.0125713
ABCA17P	0.0126248
PTRH1	0.0126622
HMGB1	0.0127283
SRRM2	0.0127331
EVI5	0.0128334
PSRC1	0.0128997
ANKRD16	0.0129353
SCN3A	0.0129682
DCAF4	0.0130179
RPS25	0.0130489
DPP7	0.0130641
ECHDC3	0.0131028
RPL7A	0.0131225
CORO1A	0.0131229
EXOSC8	0.0131438
C9orf84	0.0131459
CCDC90B	0.0131991
MBTD1	0.0132047
TATDN3	0.0132753
ABCC10	0.0132809
ZYG11B	0.0132924
PDK2	0.0132998
ZNF333	0.0133199
LOH12CR1	0.0133342
ZNF668	0.0133682
PRRC2A	0.0133935
RECQL	0.0134089
INTS10	0.0134107
ITGB3BP	0.0134154
SNAPC5	0.01343
L3MBTL2	0.0134327
ZNF420	0.0134995
FRMD8	0.0135215
FAM134A	0.0135618
CD3E	0.0136067
CLC	0.0136531
PLRG1	0.0137251
GOLT1B	0.0137452
C7orf43	0.0138294
OBFC1	0.0138296
RPS6KL1	0.0138594
HLA-DRB6	0.0138735
CCNDBP1	0.0139488
TSKS	0.0140243
DHRS1	0.0140398
RAB11FIP5	0.0140758
DNASE1	0.0141096
RFC2	0.0141325
ELMO2	0.014144
GIT1	0.0141853
ADD1	0.0141922
CYP2R1	0.0142483
RRP7A	0.014257
ELOVL6	0.0142623
CCDC59	0.0142693
TALDO1	0.0142735
TACC1	0.014305
ADCY6	0.0143095
DOK7	0.0143256
ANAPC7	0.0143303
FAM179A	0.0143637
STARD10	0.0143762
SLC2A4	0.0144075
ATP1A1OS	0.0144601
U2AF1L4	0.0144881
DCP2	0.0144934
EEF1D	0.014534
MCAT	0.0145436
SLC35E3	0.0145737
CHURC1	0.0145799
NPR2	0.0146309
EMR1	0.0146498
C21orf49	0.0146529
SNAP23	0.0146699
ITPKB	0.014701
TMEM5	0.0147203
DYRK1B	0.0147421
SYNGR2	0.0147452
SEMA4C	0.0147562
LYRM1	0.0148019
IMPA2	0.0148686
HSPA7	0.0149125
COX6A1	0.0149481
SGSH	0.0149676
DNMT1	0.0149721
TTLL5	0.0149852
MYL5	0.015014
IGFBP2	0.0150417
TNFSF9	0.015149
IARS2	0.0151758
SLC2A8	0.0152555
CITED4	0.0152624
PDGFB	0.0154241
UBA3	0.0154582
DGKQ	0.0154779
CHST10	0.0155021
LSM14B	0.0155149
MAST2	0.0155309
SLC12A7	0.0155346
TMEM170A	0.015535
JRKL	0.0155992
NSL1	0.0156461
CASP8	0.0156469
CROCCP3	0.0156624
NOXA1	0.0156763
RCBTB1	0.0156781
MPDU1	0.0156848
MIF	0.015693
EPB41L2	0.0157046
PYROXD2	0.0157491
C16orf74	0.0158015
WASL	0.0158239
TLR1	0.0158875
MCM8	0.0159022
ANGPTL4	0.0159702
DSE	0.0159959
EIF2B2	0.0160017
PYROXD1	0.0160565
ZNF548	0.0160668
FAM133B	0.0161137
PPP1R2P3	0.0161152
GTF3A	0.0161881
SYTL1	0.0161882
MAD1L1	0.0162016
SNAPC1	0.0162704
MAP3K8	0.0162833
ATAT1	0.0162851
NUDT15	0.0163569
PRKDC	0.0163682
NPM1	0.0164103
SMAD4	0.0164129
GUCA1B	0.0164321
ACSL5	0.0164888
PDSS1	0.0165083
PER3	0.0165122
BTG2	0.016515
ABHD6	0.0166108
RRP7B	0.0166902
CELF1	0.016704
CLN5	0.0167098
SENP2	0.0167253
FRMD4B	0.0167481
PQLC2	0.0167561
POLD4	0.0168649
PTGER2	0.0169013
TRIM23	0.0169098
DGKZ	0.0169327
TTC26	0.0169711
2020-03-05	0.017009
CUX1	0.0170194
ZNF626	0.0170383
TRIM4	0.0170571
CTAGE1	0.0170597
KIDINS220	0.0170631
EVI5L	0.0171554
DIP2B	0.0171661
CHRAC1	0.0171706
ACTA2	0.0171736
CAPG	0.0171807
FBXO31	0.0171927
NKIRAS2	0.0172143
KIF20B	0.0172148
RBM38	0.0172269
HSF5	0.0172473
RPL3	0.0172959
ERP44	0.0173109
EPX	0.0173175
GFPT2	0.0173422
KCNH2	0.017406
HSD11B1L	0.0174497
SERPINE2	0.0174705
CEP135	0.0174899
PRELID1	0.0175368
PREPL	0.0175846
WDR73	0.0175894
PDE2A	0.0176321
GNG8	0.017695
EFNA3	0.0176954
NTN1	0.017744
SHARPIN	0.0177658
KPNA1	0.0178021
IRAK3	0.0178469
RNLS	0.0178785
TMEM208	0.0179094
SCO1	0.0179208
MOCS2	0.0179215
FMNL3	0.0179222
MYL4	0.0180099
RAB14	0.0180744
C9orf3	0.0181349
ASF1A	0.0181404
TM7SF2	0.0181695
TMEM88	0.018207
CLDN7	0.0182178
DZIP3	0.0182782
NSMCE4A	0.0182998
ARHGAP5	0.0183334
AHRR	0.0183477
HIST1H2BF	0.0183752
ZNF76	0.0184046
HSD17B12	0.0184659
ZNF439	0.0184879
REEP4	0.0185024
EFHB	0.0185104
TYMP	0.0185408
CCAR1	0.0185824
ARHGEF7	0.0185904
LRGUK	0.0186171
TNFRSF25	0.018633
CLDND2	0.0186421
RIC8A	0.0186776
CHI3L2	0.0186879
C10orf128	0.0188268
KCNMB1	0.01884
FBXO33	0.0188757
SLC2A5	0.018955
RAD52	0.0190348
MANSC1	0.0190547
HLA-DQB2	0.0190629
THNSL1	0.0190637
C18orf8	0.0191077
AZI2	0.0191213
TUBGCP3	0.0191325
ATG10	0.0191381
OSTM1	0.0191741
YY1AP1	0.0192135
LY9	0.0192367
HERC1	0.0192446
ZNF784	0.0192582
RNMT	0.0192603
FKBP5	0.0193618
EIF4EBP3	0.0193937
CBFB	0.0194166
NAGA	0.0194466
GPA33	0.0194623
TOP3A	0.0194786
LAIR1	0.0195043
PUSL1	0.0195268
DBT	0.0195411
ERN1	0.0195606
STK24	0.0195741
PRAM1	0.0195764
PAFAH1B3	0.0196167
DAZAP1	0.0196376
RHOT2	0.0196383
PHF12	0.0196466
HIST1H4D	0.0196808
SPATC1	0.0196809
VPS53	0.0196896
HTR7P1	0.0196971
KRBA1	0.0197527
ATG13	0.019764
TRAF1	0.0197964
LRRC8A	0.0198338
NR2C2	0.0198606
TRMT2A	0.0198891
ZNF331	0.0199044
ZNRF3	0.0199118
C15orf62	0.0199234
CEL	0.0199377
DOC2A	0.0200305
ZNF385A	0.0200473
FNBP4	0.0200554
FASTKD3	0.0200916
TRIM35	0.0201173
SLC17A9	0.0201831
SF3B3	0.0201911
REEP1	0.0201926
WDFY3	0.0201954
VEZF1	0.020206
MED26	0.0202245
BET1L	0.020314
MYO18A	0.0203236
C1QTNF6	0.0203356
ARHGEF25	0.0203377
MS4A4A	0.0204053
PM20D2	0.0204183
LIPA	0.0204276
IL2RB	0.0204573
SERPINF2	0.020492
HERC4	0.0205171
CHRNA5	0.0205332
SPAG17	0.0205722
NECAP2	0.0206164
PDE4DIP	0.0206391
EIF3F	0.0206565
GALNT12	0.0206896
SYNGR3	0.020696
ATG4B	0.0207068
THRA	0.0207283
ARHGAP31	0.0207391
RASGEF1B	0.0207709
GOSR2	0.0207848
UBXN2A	0.0209109
PLXNA2	0.020921
VAMP2	0.0209931
AGPAT3	0.0210247
PRPF8	0.0211609
NANS	0.0212307
PRR24	0.0212501
PAK1IP1	0.0213552
CHD1L	0.021403
SLFN13	0.0214272
ZNF462	0.0215145
MAST1	0.0216383
RBAK	0.0216878
ATP6V0B	0.0216908
GIMAP2	0.0216941
UNC119B	0.0217158
MAN2A2	0.0217575
KLHL30	0.0218386
RANBP9	0.0220117
ALDOC	0.0220398
PAPSS1	0.0220533
FAM174B	0.0220615
CD52	0.0220621
USP48	0.0221159
GOSR1	0.0221275
B3GALNT1	0.02214
USP18	0.0221412
HTR6	0.0221579
DIS3L2	0.0222019
CNOT1	0.0222763
C8orf44	0.0223662
SCARB2	0.0223866
PSMC2	0.0223991
ZCCHC14	0.0224172
NDUFAF1	0.0224278
FKRP	0.0225156
ORC3	0.0225384
GDPD5	0.0225746
ZC3H3	0.0225756
COL7A1	0.0226117
HIATL1	0.0226333
CIB2	0.0227055
NUDT22	0.0227207
CALU	0.0227489
REM2	0.0227958
KDELC1	0.0228257
PICK1	0.0228912
IMMT	0.0229434
ZNF580	0.0229543
RAD54B	0.022975
RPUSD2	0.022987
ZNF503	0.0230083
FAM196B	0.0230853
PLA2G4A	0.0231519
KCND3	0.0232734
INPP5J	0.0232831
RNF181	0.0233314
LARP4	0.0233329
MYO1A	0.0233688
CIDEB	0.0234085
VIM	0.0234299
FEN1	0.0235223
BMP1	0.0235639
KIAA1468	0.0235765
RAB21	0.023588
C19orf48	0.0235954
NCOA5	0.0236264
TICAM1	0.0236858
RAB30	0.0237112
NUMBL	0.0237374
GPX7	0.0237698
RAB6A	0.0238261
ZNF862	0.023849
ATP8B5P	0.0238526
GTPBP8	0.023887
TNFSF4	0.0238968
PLXDC2	0.0238988
SLC25A17	0.0239454
RCN3	0.0239928
GPX1	0.0240074
XRN2	0.0240104
PAPD4	0.0240309
CCHCR1	0.0240321
ZDHHC7	0.0240534
CCDC116	0.0240611
QARS	0.0240689
DEPDC7	0.0240774
CD44	0.0241148
RPS24	0.0241236
PACS1	0.0241483
RFX1	0.0242119
SIRT2	0.0242278
CCDC107	0.0242356
ZC3HAV1	0.0242465
HDHD3	0.0242729
BNIPL	0.0242978
CCDC141	0.0242998
FAS	0.0243003
C19orf54	0.0243046
ZCCHC24	0.0243071
MFN1	0.0243143
CSNK1E	0.0243241
EPHB2	0.0243527
OAZ2	0.0243667
ZNF554	0.0244036
WASH2P	0.0244773
LMNB1	0.0245031
DNAJC11	0.0245131
SIX5	0.0245329
HSF4	0.0245842
UBXN6	0.0245994
EML5	0.0247755
C3orf62	0.0247873
HOOK2	0.0248292
POLDIP2	0.0248591
OASL	0.0248898
HSDL1	0.0250081
EPB41L4A	0.0252059
GPR108	0.0252861
RBMS3	0.025299
RUVBL1	0.0253795
OSBPL11	0.0253864
ERAP2	0.0253882
ATF7IP	0.0254185
TMEM91	0.02543
NME1	0.0254662
GEMIN5	0.0254754
TIMM10	0.0255206
DDX24	0.0255276
BCL7A	0.0255277
KCNK13	0.0255283
YDJC	0.0255425
INPP5B	0.0256173
MUC4	0.0256372
ZNF708	0.0256803
NSUN5	0.0257787
POLE2	0.0258272
SLC5A5	0.0258548
POLR2E	0.025868
BAK1	0.0258948
SCFD2	0.025951
GBGT1	0.025963
HOMER2	0.0259649
SFI1	0.0259695
USP1	0.0260252
GALM	0.0260744
SQRDL	0.0260921
CCR5	0.0261205
CAPN5	0.0261401
EML4	0.0262612
TTLL11	0.0262918
C8orf82	0.026309
LSM4	0.0263232
METRN	0.0263269
PRKAA1	0.0263314
LLGL2	0.0263463
C4orf46	0.0263897
RAD23B	0.0264198
MTDH	0.0264242
EID3	0.0265284
ADCY3	0.0265516
DNAJC18	0.026596
PPP1R1B	0.0266883
WDR26	0.0267223
HEATR2	0.0268095
CCDC50	0.0271071
DHDDS	0.0271301
MTO1	0.0271314
MSL2	0.0271469
UMODL1	0.0271752
IQCC	0.0272477
TNFSF13	0.0272633
MINA	0.0272837
LILRA1	0.0272983
TMX1	0.0273362
RNASEH2C	0.0273902
ARL2	0.0274136
ACTN3	0.0274147
POLR1C	0.0274398
PARL	0.0274541
TMX3	0.0274651
CBX5	0.0274872
MRPS6	0.0275022
KIAA0100	0.0275549
MYO7A	0.0275702
TRAF2	0.0276094
PUS7L	0.0276496
ZNF69	0.0277032
C16orf70	0.0277131
C5orf27	0.0277159
E2F4	0.027731
HSF2BP	0.0277761
CBX6	0.0278195
ATP5EP2	0.02787
PPP4R1	0.0278728
PCDHGB6	0.0278769
ACN9	0.0278797
RPL18	0.0278934
RBCK1	0.0279112
FANCC	0.0279411
GLTSCR1	0.0279833
CES2	0.0280303
ANKH	0.0280381
PSD2	0.0281005
CNOT10	0.0281396
EPHA1	0.0281775
SERINC3	0.0282985
ZNF444	0.0283046
PEX7	0.0283205
GGPS1	0.0283647
ATP13A4	0.0283692
TBXAS1	0.0284106
HIST2H2AC	0.0284286
PARP2	0.0284393
C22orf15	0.02849
WDR6	0.0284996
SAC3D1	0.02852
ZC3H15	0.0285379
DUSP16	0.0286743
ZNF446	0.0286894
RMI1	0.028698
ADORA1	0.0287224
ZMYND10	0.0287312
TMEM53	0.0287323
NCKIPSD	0.0287754
TMEM11	0.0288686
WWC1	0.0289448
CALML4	0.0290004
EIF4E2	0.0290853
TMEM147	0.0291156
ZNF592	0.0291305
SH2B3	0.0291429
WEE1	0.0292204
P4HA2	0.0292658
HES4	0.0292994
CCBL1	0.0293723
CDAN1	0.0293858
SDHA	0.0293865
RPS12	0.0294039
PDIA3	0.029449
EMID1	0.0294802
DAPK3	0.0295626
WDYHV1	0.0296016
DPY19L2	0.0296996
TMEM19	0.0297763
MZT1	0.0298189
PPP2R5D	0.0298709
YEATS4	0.029961
UBXN7	0.0300545
LIPN	0.0300835
C7orf26	0.0300995
SENP8	0.030104
DND1	0.0301348
ECHDC1	0.0302037
FNDC3B	0.0302096
SLBP	0.0302434
HIF1A	0.0302692
SELPLG	0.0303189
ZNF707	0.0303467
FAM13B	0.0303553
EYA2	0.0303994
TESC	0.0304462
ULK3	0.0304815
RAC2	0.0305469
MAPK6	0.0305572
GATAD1	0.0306293
ATP1A4	0.0306351
HIGD1A	0.0306412
QKI	0.0306767
PIWIL4	0.0307361
TTC23	0.0307582
SSR1	0.0307693
C9orf78	0.0308213
DCLRE1B	0.0308774
TSPO	0.0309329
ARHGEF12	0.0309702
SLC39A9	0.0309999
KREMEN1	0.0310387
MPST	0.031052
SCLY	0.0310599
COL15A1	0.0310741
TBC1D2B	0.0310948
C16orf59	0.0311143
ECT2L	0.0312434
NUDT16	0.0312828
TRABD	0.0313071
ZNF445	0.0313076
SRD5A1	0.0313474
LRRC37A	0.0313873
ISG20	0.0314118
IL21R	0.0314464
POLR3A	0.031595
PQLC3	0.0316056
LSM14A	0.0316415
B2M	0.0316449
GPT	0.0317219
EIF1	0.0317413
SNPH	0.0318408
FSD1L	0.0318546
CRIP2	0.0318598
NDUFB1	0.0318906
EXOC3	0.031972
KLHL9	0.0319753
RALA	0.0319869
FLVCR1	0.0320751
CCDC93	0.0320941
SUSD1	0.0321257
MKS1	0.0321319
GATSL3	0.0321414
FBXO27	0.0321875
C1S	0.0322623
RHOBTB2	0.0322784
SPSB3	0.0323077
TBCCD1	0.0323411
ALDH3A2	0.0323998
CD59	0.0324395
FUK	0.0324712
TBK1	0.0324914
STK32C	0.0324939
MCM5	0.0326323
GNPDA2	0.0326517
WDR46	0.0326893
SNRNP40	0.0327271
IKZF3	0.0327306
ICAM2	0.0328342
ANKDD1A	0.0328414
GNA12	0.0328476
SERHL2	0.0328648
LYST	0.0329384
PSMB1	0.0329459
HSP90AA1	0.0329828
AZIN1	0.032984
PTPRJ	0.0330012
TNRC6C	0.0330074
DENND2C	0.0330244
FLT3LG	0.0330778
MYBPC3	0.0331038
UBE2E1	0.0332447
PACSIN2	0.0332678
MORN4	0.0333075
NLRX1	0.0333469
PMPCA	0.0333825
LBR	0.0333934
PRRT2	0.0334457
PTK2B	0.033453
KHDC1	0.0334596
CDC14A	0.0334682
KHK	0.0335072
YWHAE	0.0335732
PRUNE	0.0336525
C9orf142	0.0336606
LRRC8B	0.0337369
SPESP1	0.0337814
AKR1A1	0.0338013
EIF4EBP2	0.0339467
BTG1	0.0339488
YWHAG	0.0339507
MLYCD	0.0339536
CAPS	0.0340187
CLASP2	0.0340243
GALC	0.0340633
RRP1	0.0340824
PAX6	0.0340877
UTP3	0.0340881
[truncated: 9,951 more rows]

## Sheet: S8B
hgnc_symbol	P_Value
MDC1	1.84108e-89
MCMBP	3.39458e-77
POLR1A	1.01721e-61
TBC1D24	1.09138e-61
PAQR4	5.14865e-57
RIC3	1.00979e-49
ARHGEF11	1.27363e-47
HECTD3	1.65902e-47
TRIM38	8.74446e-46
MYL5	4.36998e-44
GMDS	3.14755e-40
SCAMP5	5.04086e-40
MCM2	9.32098e-40
GTF3C5	2.72367e-39
LYSMD2	2.75308e-38
RAD51	7.94972e-36
KPTN	1.7224e-34
TOP1MT	9.44577e-33
RND1	2.55071e-32
UBE3C	3.14071e-31
FNTB	3.47844e-31
TUBG2	6.60634e-31
NT5C	1.62894e-30
TPCN2	1.50359e-29
SH3BP5L	8.40144e-28
ZNF277	5.70488e-27
ADPRH	9.6292e-27
GNB2L1	4.38793e-26
MIIP	9.65221e-26
PPA2	1.10196e-25
TMED3	3.07914e-25
CHMP7	3.19095e-25
MTIF2	1.36969e-24
SNAPC1	3.04407e-24
SAMM50	3.3562e-24
MVD	6.63876e-22
ZNF655	1.1104e-21
CD2BP2	1.43301e-21
PODXL2	2.2829e-21
CPSF3	5.35379e-21
TSSC1	8.34671e-21
AGER	1.55056e-20
SCAMP4	1.57291e-20
SMAD1	9.41643e-20
STRA13	8.01281e-19
COMTD1	8.60659e-19
RPL29	2.84305e-18
HSPA1B	2.91272e-18
CBR1	3.12506e-18
TMEM154	3.45317e-18
MTRR	3.77884e-18
NDRG1	4.54207e-18
INTS8	6.22445e-18
C8orf76	7.04323e-18
ACAD9	9.35016e-18
ZNF273	1.40932e-17
HADHA	2.30132e-17
NAPRT1	3.20276e-17
MAN1B1	3.8168e-17
FCGBP	8.25232e-17
TDP1	9.66391e-17
FNBP1	2.46924e-16
ABT1	2.92884e-16
SDHB	3.39269e-16
FAM167B	3.84704e-16
RPL38	4.12591e-16
OGG1	4.41552e-16
ADI1	6.79939e-16
MRPS16	1.04953e-15
RNF167	1.39443e-15
CTSZ	1.67003e-15
CASKIN2	2.30506e-15
PRDX3	2.56453e-15
SCNM1	4.17856e-15
DEF6	4.55051e-15
CPNE1	5.5485e-15
PARP14	7.49472e-15
EFNA3	8.47052e-15
ARHGAP19	1.05315e-14
LRRFIP2	1.06942e-14
PARP12	1.13993e-14
SLC39A4	1.14526e-14
CHD6	1.34145e-14
BCR	1.53181e-14
TIGD6	1.96776e-14
TRIB3	2.33453e-14
TCF19	4.20255e-14
MUTYH	6.55324e-14
NUP205	8.16005e-14
BPHL	1.32843e-13
MAF1	1.34298e-13
CSNK1D	1.52298e-13
LAMA5	2.07452e-13
SLC4A1AP	2.62758e-13
HCG11	3.30765e-13
DPEP2	4.81021e-13
NAGS	5.36228e-13
ARPC4	6.58844e-13
SH2B3	6.68763e-13
PVRL2	7.69136e-13
DDX18	9.20118e-13
IFNAR1	1.06923e-12
PIGN	2.7676e-12
KCNJ15	4.00783e-12
ZNF776	4.06132e-12
FDXR	4.08065e-12
ALDH3B1	4.35882e-12
SH3BP1	4.777e-12
UROD	5.53054e-12
BCAS2	6.99769e-12
ARSA	8.39573e-12
C11orf35	8.96003e-12
SPAG7	9.31258e-12
GEN1	9.58472e-12
2020-09-09	1.02863e-11
SH3BGRL3	1.15718e-11
NOP56	1.54766e-11
MED19	2.56679e-11
ARHGEF17	2.62618e-11
FBF1	3.10547e-11
ORAI2	3.77309e-11
PIGM	4.0858e-11
NUDT1	5.57676e-11
ZCWPW1	6.28029e-11
WDR74	7.08788e-11
ACSS1	7.86788e-11
EMG1	8.11396e-11
DTNB	9.38159e-11
SLC2A11	1.00195e-10
C7orf13	1.09408e-10
SLC17A9	1.14376e-10
ZNF16	2.43432e-10
MGAT1	2.50988e-10
MIS12	2.71518e-10
ZNF217	2.73639e-10
TYW1B	2.85942e-10
EFEMP2	3.14779e-10
NMNAT1	3.289e-10
NDST1	4.59097e-10
RNASEK	4.74763e-10
SLC45A4	5.13849e-10
SNX17	5.8723e-10
C6orf48	6.03034e-10
PBX2	6.52839e-10
POLR3GL	6.73722e-10
RAB11FIP3	7.84326e-10
PPP1R13L	8.59428e-10
C9orf89	8.77867e-10
RNF170	8.88404e-10
RAB27A	1.05493e-09
CATSPERG	1.15147e-09
EIF4A3	1.68326e-09
CMTM7	2.20719e-09
ERMP1	2.51591e-09
SHMT1	2.51933e-09
HCST	2.65148e-09
GOLT1A	3.56176e-09
ENDOG	3.65037e-09
NQO1	4.43456e-09
FOXRED1	5.18939e-09
NOP10	5.93125e-09
SLC25A15	6.04888e-09
ATG16L2	6.19079e-09
LOXL3	6.25604e-09
ULK4	7.20557e-09
CSRNP1	7.79715e-09
TMCO4	8.41792e-09
SEC61A2	8.65062e-09
AFMID	9.94458e-09
GSDMB	1.13501e-08
ENO2	1.83297e-08
TJP3	1.83692e-08
RFC5	1.8724e-08
TFAM	2.00367e-08
TNKS	2.14178e-08
ANXA7	2.16629e-08
FAIM3	2.41342e-08
TFB1M	2.42081e-08
CDK18	2.49337e-08
CCDC25	2.61538e-08
C8orf33	2.79951e-08
GPR35	2.81393e-08
IL10	3.05934e-08
CD300LB	3.16624e-08
RAB7L1	3.25218e-08
ITGA3	3.58045e-08
KLHDC7B	3.93487e-08
C11orf80	3.94637e-08
MT3	4.53144e-08
KIAA1598	4.76609e-08
RCN3	4.78661e-08
SNX32	5.48667e-08
FAM24B	5.56354e-08
GRAMD1C	5.71832e-08
TM6SF1	6.30433e-08
PTOV1	6.37347e-08
TMEM55A	6.7337e-08
FGF11	7.27041e-08
ICMT	7.29454e-08
PGM1	7.40326e-08
STX7	9.47911e-08
HIST1H3E	1.00123e-07
ARNTL	1.03107e-07
MYO18A	1.15246e-07
MPEG1	1.16922e-07
GPR125	1.29246e-07
ELOF1	1.31184e-07
PTGIR	1.39696e-07
TGIF1	1.48462e-07
KIAA1875	1.57427e-07
ZFAND2A	1.58293e-07
CPNE8	1.5925e-07
SHPK	1.61413e-07
TPMT	1.7215e-07
NGRN	1.91917e-07
ZMYND10	1.92067e-07
TIAM1	1.97349e-07
CMKLR1	1.97689e-07
CEACAM1	2.23524e-07
FAM111A	2.25776e-07
ZNF672	2.40057e-07
SH2D2A	2.47784e-07
ARRB2	2.53524e-07
C18orf54	2.61146e-07
WDR41	2.65243e-07
ABCF1	2.71904e-07
SCNN1D	2.75759e-07
SLC22A18	2.759e-07
SYNGR1	2.86295e-07
UPK3B	2.88538e-07
LRRC37BP1	3.12194e-07
MYBL2	3.40828e-07
ZNF619	3.43748e-07
GRWD1	3.65463e-07
TMEM143	3.66887e-07
PSKH1	3.74907e-07
PCNT	3.87593e-07
TMBIM4	4.30363e-07
POT1	4.339e-07
STMN1	4.41266e-07
EIF3D	4.43727e-07
PNRC1	4.46712e-07
CC2D2A	4.63708e-07
MFF	4.83211e-07
CYP4V2	5.17249e-07
GLYR1	5.38076e-07
YOD1	5.47851e-07
RCN2	5.49018e-07
CXXC5	5.54176e-07
ADORA2B	6.2362e-07
ADAP1	6.28109e-07
VARS2	6.55049e-07
C9orf78	6.76395e-07
PHPT1	6.88952e-07
NAP1L1	6.95438e-07
LIN7A	7.14895e-07
DERA	7.53099e-07
NFRKB	7.59001e-07
BRF1	7.97981e-07
MPZ	8.37891e-07
ATR	8.39965e-07
MDH2	8.40552e-07
PLEKHJ1	8.63991e-07
GLOD4	8.90564e-07
TRIM41	9.27686e-07
UBLCP1	9.47974e-07
EXOC2	9.5901e-07
FAM168A	1.02903e-06
DOK1	1.0339e-06
RAPGEF1	1.03789e-06
EIF2S1	1.06914e-06
RIN1	1.08847e-06
SPSB2	1.09953e-06
MIF	1.10092e-06
IQCE	1.13169e-06
C7orf26	1.15226e-06
PPIL3	1.25055e-06
ZC3H12D	1.26976e-06
GART	1.28541e-06
SLC6A12	1.31847e-06
DAD1	1.39276e-06
HLA-DPB2	1.48102e-06
ESYT2	1.49635e-06
RANBP3	1.50967e-06
SCRN2	1.51766e-06
EFHC1	1.53308e-06
PFKP	1.53802e-06
ESPN	1.57825e-06
LZTR1	1.58607e-06
KCNC3	1.60583e-06
CBX7	1.61096e-06
SIGLEC16	1.64957e-06
DCXR	1.68033e-06
C16orf86	1.73102e-06
RPUSD2	1.74744e-06
TYK2	1.75452e-06
TMOD2	1.85191e-06
FAM160A1	1.87483e-06
HERC6	1.93139e-06
HECW2	1.95204e-06
MYOM1	2.14157e-06
HCG18	2.2068e-06
SLC16A13	2.21406e-06
CLEC2D	2.24447e-06
BSCL2	2.26447e-06
KDM1A	2.34142e-06
ABCB9	2.40223e-06
UCP3	2.42007e-06
OSBPL2	2.45834e-06
MCM3AP	2.58815e-06
FLYWCH1	2.60005e-06
GTF2H1	2.60189e-06
AURKB	2.63802e-06
GPM6A	2.80356e-06
HCK	2.8289e-06
STOX1	2.93463e-06
CDHR1	2.96093e-06
PSMB8	2.96268e-06
ZNF18	3.13653e-06
NT5M	3.24795e-06
MRPS11	3.26613e-06
GLTPD1	3.52984e-06
ATF7	3.59668e-06
ZDHHC24	3.67204e-06
PYGB	3.67961e-06
OCEL1	3.78741e-06
PRCP	3.86144e-06
DDX19A	3.89591e-06
PRKD2	3.94706e-06
SMPD2	4.02054e-06
PCK2	4.09303e-06
CPSF1	4.10984e-06
C12orf57	4.15499e-06
ISCU	4.46398e-06
GIPC1	4.70358e-06
EPB41L2	4.71283e-06
NUDT13	4.74224e-06
DAK	4.92458e-06
FRA10AC1	5.00586e-06
SLCO4A1	5.05558e-06
C7orf50	5.40867e-06
KIAA0391	5.45868e-06
SLC16A11	5.48601e-06
HIST1H2AE	5.50056e-06
MAPRE2	5.50806e-06
TCEB3	5.55156e-06
PQLC1	5.6062e-06
COQ5	5.77417e-06
RAPGEF3	5.79908e-06
CLTCL1	5.96346e-06
FAM167A	6.09952e-06
TPRA1	6.52685e-06
MKS1	6.69011e-06
C14orf159	6.73334e-06
MICAL1	7.06961e-06
C17orf89	7.13824e-06
MTERFD2	7.29891e-06
PPP2R1A	7.53737e-06
ADAM15	7.57231e-06
PAXIP1	7.57271e-06
C9orf114	7.73965e-06
ARPC5	7.747e-06
SGPP1	8.00481e-06
XCL2	8.04258e-06
SEC14L1	8.09928e-06
AP3B2	8.1409e-06
ALDH3A2	8.23686e-06
CASC3	8.7788e-06
FEM1A	8.79282e-06
CBLN3	8.88091e-06
POLR1B	8.90925e-06
TRIM27	8.98327e-06
CARD14	8.98604e-06
CEACAM21	9.12837e-06
SIAE	9.23296e-06
RAB8A	9.32103e-06
TRIM14	9.6559e-06
SLC19A1	9.69682e-06
SERAC1	1.00349e-05
COL7A1	1.02895e-05
LRRC45	1.0297e-05
NSMCE1	1.03263e-05
C1QTNF6	1.09828e-05
ITPR3	1.09868e-05
IL24	1.15292e-05
LYSMD1	1.18249e-05
EFCAB4A	1.21244e-05
TRIM5	1.23991e-05
SHF	1.26026e-05
RFFL	1.28686e-05
PCBP3	1.29183e-05
GCC2	1.33024e-05
PASK	1.39244e-05
MCOLN2	1.40439e-05
DHX34	1.42971e-05
AAGAB	1.44122e-05
SNX7	1.45062e-05
AIFM2	1.50853e-05
RCC1	1.51627e-05
LRRC29	1.54846e-05
MAPK3	1.56811e-05
C11orf82	1.59307e-05
PUSL1	1.60356e-05
DUS3L	1.61278e-05
CCT8	1.61682e-05
DNAJC14	1.61977e-05
IER3	1.6543e-05
DIRAS1	1.68391e-05
C16orf13	1.80398e-05
C9orf3	1.85418e-05
PMAIP1	1.86856e-05
TNNC1	1.87903e-05
GRM2	1.89272e-05
STX8	1.91049e-05
ISG20	1.92527e-05
GGA2	1.9293e-05
MYO1E	1.93096e-05
KIF3C	1.9314e-05
ATP2A1	1.94666e-05
NEK8	1.95032e-05
BLZF1	1.9624e-05
CARKD	1.96491e-05
PER3	1.99598e-05
RASSF6	2.0912e-05
TMEM115	2.10049e-05
TBC1D14	2.17513e-05
MEPCE	2.19097e-05
LCLAT1	2.19116e-05
APRT	2.21728e-05
NOL9	2.23436e-05
ZNRD1	2.24062e-05
ZNF24	2.25262e-05
GLYCTK	2.27456e-05
FCRL5	2.31967e-05
TOMM22	2.34357e-05
RPF1	2.42507e-05
LMO4	2.47375e-05
ZNF337	2.48257e-05
MZT2A	2.49668e-05
DHX57	2.52308e-05
EIF4H	2.55018e-05
LNPEP	2.56032e-05
SUMF2	2.63007e-05
IKBKB	2.64017e-05
SNRNP48	2.64526e-05
GPHN	2.6904e-05
SNX5	2.74412e-05
HIST1H4D	2.81434e-05
SNX21	2.83493e-05
VRK3	2.8653e-05
CDS2	2.91745e-05
GSDMD	2.93364e-05
INVS	2.983e-05
HDLBP	3.15838e-05
SIRT3	3.20054e-05
VPS13B	3.22082e-05
CEP192	3.25281e-05
PPP1CC	3.28249e-05
ANKRD42	3.29621e-05
WDR90	3.33918e-05
THOP1	3.39786e-05
MCM3	3.39942e-05
TMEM80	3.43752e-05
PCCB	3.56697e-05
DNAJC21	3.67822e-05
FARP1	3.71552e-05
TNFAIP8L2	3.7763e-05
RDH5	3.79514e-05
WFIKKN1	3.80405e-05
PNKP	3.80646e-05
NCOA7	3.87725e-05
NUP214	3.91926e-05
ATOX1	3.95539e-05
CDHR5	4.0057e-05
TRIOBP	4.02564e-05
ZNF532	4.04106e-05
ASPHD2	4.04794e-05
WDR6	4.12792e-05
HLA-DOB	4.13638e-05
ADCY5	4.15194e-05
C1orf228	4.1752e-05
DNAJB5	4.21225e-05
CNTNAP1	4.21332e-05
LRRC58	4.26709e-05
TLN1	4.30218e-05
KIAA1324	4.37592e-05
SNRNP25	4.40957e-05
FMNL2	4.41857e-05
NCAPH2	4.43578e-05
SEPW1	4.47699e-05
IMPA2	4.51494e-05
TMEM102	4.57491e-05
E2F5	4.62337e-05
NUDT16P1	4.62733e-05
SFXN4	4.68425e-05
DENND1A	4.68647e-05
TCFL5	4.69116e-05
ODF2L	4.72993e-05
SYNGR2	4.7487e-05
AFF4	4.88087e-05
ZNF117	4.96498e-05
OSBPL10	4.97186e-05
FAM105B	5.00916e-05
ZFPL1	5.0347e-05
DOCK9	5.11825e-05
CPSF2	5.2405e-05
E2F3	5.24469e-05
SIVA1	5.33911e-05
MYO9A	5.34264e-05
RPL8	5.41075e-05
BCAP29	5.43119e-05
FPGS	5.62658e-05
CTSH	5.6669e-05
C3orf52	5.7476e-05
BIN1	5.88656e-05
PARP2	5.88811e-05
WFDC3	5.90838e-05
PVRL1	5.96715e-05
KCNN4	6.03464e-05
MKNK1	6.05577e-05
PSPH	6.23415e-05
GTF2I	6.24024e-05
SLC25A45	6.29747e-05
CCS	6.36599e-05
PLCD3	6.43441e-05
SACS	6.46352e-05
BTN3A1	6.54598e-05
KCTD21	6.57259e-05
TRPM2	6.61518e-05
SSNA1	6.69509e-05
SLC12A7	6.78673e-05
EID1	6.81191e-05
MLYCD	6.85833e-05
SEL1L3	6.89228e-05
MICALL1	6.99596e-05
CCDC77	7.12919e-05
AMN1	7.26066e-05
GTPBP3	7.30271e-05
RNLS	7.34799e-05
DROSHA	7.40379e-05
SIK2	7.42397e-05
ING4	7.49026e-05
BCAT2	7.52706e-05
FBLN5	7.62e-05
TSEN2	7.66364e-05
SERPINB10	7.70545e-05
CCHCR1	7.90839e-05
LMBR1L	8.02648e-05
TXNL4B	8.04816e-05
ZNF343	8.08595e-05
ETV7	8.13318e-05
CARS2	8.16048e-05
C8orf31	8.31883e-05
SERPINB9	8.41515e-05
IKBKE	8.42456e-05
PSMD14	8.45208e-05
FANCG	8.63009e-05
ATP6AP1L	8.66257e-05
ELAC1	8.67582e-05
POLR3K	8.85994e-05
SBNO1	8.86771e-05
PLCG1	8.89775e-05
NFKBIL1	8.97038e-05
GNG8	9.23362e-05
C7orf49	9.25972e-05
C4orf21	9.28981e-05
LY75	9.35139e-05
ARSG	9.59402e-05
WDR18	9.69086e-05
SLC11A1	9.97326e-05
BAG2	9.99861e-05
C8orf46	0.000102007
MAK	0.000102019
RHPN1	0.000102612
PRR22	0.000104001
NEAT1	0.000104156
SRR	0.000104241
TRIM66	0.000107179
DNM1P35	0.000107548
RPS28	0.000109571
HPS6	0.000110933
HEXA	0.000111797
SIGLEC11	0.000112166
MRPS7	0.00011234
RUSC2	0.000114416
ZC3H3	0.000116531
GATM	0.0001166
ANXA6	0.000117107
ZC3H10	0.000119223
NSMCE4A	0.000119813
GGA1	0.000121151
TTLL12	0.000122293
ATP5G2	0.000123018
SHISA4	0.000126447
SERPINB6	0.000127002
HIST1H2BD	0.000129093
KCNMB1	0.000129152
NHEJ1	0.000129296
CHMP1A	0.000129342
KTN1	0.000129636
HMG20B	0.000129819
RASSF2	0.000130689
CORO1C	0.000130807
ITCH	0.000130893
ANKRA2	0.000131102
MS4A4A	0.000132567
VAMP1	0.000133061
IRF6	0.000133977
TMC4	0.000135421
CLIP2	0.000136223
WWP2	0.000136911
TMEM150B	0.000138286
PLEKHG5	0.000140042
PRKRIP1	0.000140968
ZFYVE20	0.000141208
PSMD6	0.000142278
PGLS	0.000143342
PIKFYVE	0.000144476
RAD54B	0.000145928
ABCC10	0.00014661
C19orf10	0.000146964
LY6G5B	0.000147324
IMP4	0.000150879
ARMC7	0.000150901
COPA	0.000151227
LRRC28	0.000151397
CTSO	0.000151414
RNH1	0.000151763
TTC12	0.000151969
CHAC2	0.000153153
MSH6	0.000155086
METAP2	0.000156004
DYNLT1	0.000158748
RPS6KL1	0.000159494
EXOC3	0.00016003
HERC2	0.000161209
BBS2	0.000161937
KIFC2	0.000162225
VPS26A	0.000164663
TMEM106A	0.000165839
UBAP2	0.00016661
RNF32	0.000167426
ZNF211	0.00016964
COG4	0.000169888
RUVBL2	0.000170446
NDOR1	0.000171996
CCDC114	0.000172089
NICN1	0.000172584
NR3C2	0.000173408
SPA17	0.000177927
TRPV1	0.000178793
TOE1	0.000179564
HSP90B1	0.000183068
HLX	0.000183537
MED20	0.000183893
FLVCR2	0.000184413
TMEM134	0.000185062
TMPO	0.00018555
RPL28	0.000186442
MBOAT4	0.00018682
MFAP3	0.000188489
TRIM7	0.000189761
SERPINE2	0.000190731
MYL6B	0.000192209
INPPL1	0.000194209
PGM2L1	0.000195859
ALG12	0.000199973
LIMD1	0.000201194
CNPY2	0.000201209
DPH3	0.00020192
CECR1	0.000203743
PRUNE2	0.00020735
FRMD4B	0.000208052
FADD	0.000208055
ADA	0.000210506
HSD17B12	0.00021298
SLC39A7	0.00021337
ANO10	0.000216013
BIVM	0.000217114
MLXIP	0.000218606
KCNK6	0.000219056
QKI	0.000223199
NUP43	0.000223893
SQRDL	0.000225388
PJA2	0.00022543
ARL16	0.00023107
NSUN6	0.000231253
IFT52	0.000233353
FBXL6	0.000234126
C2orf15	0.000234647
ABCC3	0.000235347
PIP5KL1	0.000235381
ZNF652	0.000236621
NME3	0.000238191
CKAP5	0.000244282
SOCS6	0.000245788
MYOT	0.000247494
PHTF1	0.000249524
SPIRE2	0.000250763
BTN3A2	0.000250897
YIPF5	0.000252063
MRP63	0.000252072
OSBPL9	0.000253908
PIN1	0.00025531
ZNF518B	0.000255346
ZNF205	0.000258206
DAPP1	0.000263069
TSPAN3	0.000265625
ZBTB39	0.000268239
PIK3C3	0.000277463
PLEKHO2	0.000277636
RTN2	0.00028112
PINK1	0.000283197
SLC16A4	0.000285619
PAQR8	0.000286031
NCALD	0.000300367
PPP2R1B	0.000301828
PPME1	0.000307541
ALOX12	0.000308373
SMARCE1	0.000311414
E2F6	0.000315609
GALNT1	0.000318453
AIMP1	0.000318737
DOCK6	0.000321987
TRAF2	0.000322282
LRRC23	0.000322721
ATP8B2	0.000326113
MORN1	0.000330963
GPSM1	0.000332105
MAGEF1	0.000332667
ZNF514	0.000336739
UHRF1BP1	0.000339116
ZP3	0.00034044
EBI3	0.000342787
RFX2	0.000354086
AIG1	0.000354441
RPL34	0.000356256
RAI1	0.000356313
TXLNA	0.000357598
PSMD13	0.000358454
MTFR1	0.000359313
IL4	0.000359807
ZNF438	0.000360513
CCDC102A	0.000364195
RPL14	0.000375891
ERAP1	0.000379162
PPP1R3G	0.00038029
ATP5J2	0.000382687
ARHGEF7	0.000383336
ASF1A	0.00038657
HAGHL	0.000390196
RPS14	0.000390294
SLC31A1	0.000394577
STARD10	0.000397286
MAP2K3	0.000398944
DGAT1	0.000399412
DDR1	0.000399778
ZNF787	0.000401831
GNMT	0.0004027
PDCD2L	0.000406774
CAT	0.000407239
MRPL49	0.000408886
DHX58	0.000412275
GRHPR	0.000413146
WDR25	0.000416699
ZNF253	0.000418203
NEDD4	0.000418847
NCR3	0.000419615
TRAPPC1	0.000419963
TRUB1	0.000419993
TTLL3	0.000420508
PKIA	0.000421753
NDUFS8	0.000422851
BCL2L12	0.000426113
U2AF1L4	0.000429207
IL32	0.00043614
NRARP	0.00044191
SSR1	0.00044479
HMBOX1	0.00044755
GBA2	0.000449725
TAS1R3	0.000450478
RNF216	0.000450992
SCO2	0.000451114
TXNDC15	0.000453229
PEX19	0.0004628
NPAT	0.000467126
KIAA1683	0.000468345
ZNRF3	0.00046835
CEP152	0.000469168
NFKBID	0.000480005
PXDNL	0.000480965
STX1A	0.000483144
B3GALT2	0.000485833
ADAT3	0.000486555
CLEC17A	0.000492587
CUL9	0.00049549
MINK1	0.000497678
CBX3	0.000502544
TMBIM1	0.000504758
SP140L	0.000508812
PPP1R2P3	0.000510955
SNX1	0.00051242
KLHL22	0.000513035
SLC23A3	0.000515272
SDR42E1	0.000516076
DSCC1	0.000518781
GCHFR	0.000521061
CASP9	0.000545281
UBE2J1	0.000549325
EMID1	0.000551302
CD96	0.000551927
C19orf53	0.000552156
COG6	0.000552956
SCARB1	0.000557662
PSMB9	0.000560139
GNB5	0.000560962
TMEM66	0.000570152
NME6	0.000571191
CIAPIN1	0.000573379
CCR3	0.000575538
SUPV3L1	0.00057673
KIF5C	0.000578799
WASF2	0.000580135
C14orf132	0.000582094
DNAJC15	0.000582569
FTL	0.000584215
SOX12	0.000588971
KRT81	0.000590176
SDF4	0.000590764
DNASE1	0.000591451
FLOT1	0.000593058
ICOSLG	0.000602417
GRAMD4	0.000608846
EIF2S2	0.00061074
HLA-F	0.000612955
KLHL6	0.000620446
CCDC115	0.000623453
NHP2L1	0.000627304
CCR5	0.000627728
FAM83G	0.000628115
SRM	0.000630998
AMH	0.000632908
ZNF701	0.000633021
ZNF823	0.000637796
TSPO	0.0006402
SENP2	0.000641493
PDZD7	0.000642977
ALS2	0.000646637
SLC25A11	0.000648026
USP54	0.000653053
PABPC1	0.000659144
MRPS9	0.00067031
CD53	0.000677258
C14orf169	0.000684115
ZNF45	0.000689843
MGA	0.000689888
LRFN3	0.000697715
GCDH	0.000697719
CXCL16	0.000700637
CLN6	0.000711799
POM121C	0.00071471
SLC12A6	0.000715181
GATAD2A	0.00071715
GALK1	0.000724576
ENTPD2	0.000725472
HAUS8	0.000728083
FMNL3	0.00072862
MRI1	0.00073199
INADL	0.000736256
CNTD1	0.000739582
FAM107B	0.000740969
ZNF763	0.000741804
FMO5	0.000742635
SLC22A15	0.000752664
RBBP8	0.000754089
DHX16	0.000757548
DBF4B	0.00076858
DARS	0.000777027
CHMP2A	0.000795672
SSBP4	0.000797427
TAPBPL	0.000811047
SPATA2L	0.000814119
PTGES2	0.000817421
HGF	0.000820463
TST	0.000830456
DCK	0.00083707
IKZF3	0.000838512
DAP	0.00083854
TSKS	0.000840661
GAMT	0.000842137
MGST3	0.000845001
OSCAR	0.000848253
EPX	0.000852551
GTPBP1	0.000857979
CD86	0.000863327
KBTBD2	0.000868691
GPAA1	0.000880244
ZNF213	0.000882648
DCAF4	0.000883733
GLRX	0.000885738
CCDC17	0.000886198
IL10RA	0.000893817
KLHL23	0.000894035
PTPN12	0.000895978
RGS3	0.000899341
NME7	0.000902268
CCDC59	0.000902802
INTS1	0.000904299
SLC7A7	0.000904878
EIF2AK3	0.000912258
RASSF4	0.000926154
FAM118B	0.00093678
GAPDH	0.000941273
MON1B	0.000953705
IFNAR2	0.000955197
RBM28	0.000956014
TCHP	0.000965946
WIPI1	0.000970042
LPAR2	0.000970819
RAB7A	0.000973976
ADK	0.000977859
LRRC61	0.000990075
UAP1L1	0.000990762
ANKRD34A	0.000999157
PGAM1	0.00100139
THEM4	0.00100194
PARP16	0.00100646
HLA-DQA1	0.0010174
SERTAD3	0.00104023
ZNF772	0.00104432
FKBP4	0.00104611
C5orf24	0.00104977
JRKL	0.001053
HCP5	0.00105371
DEPDC7	0.00105549
PLCB3	0.00105872
DERL1	0.00106247
IFI30	0.0010629
ADAM8	0.00106703
SPTLC1	0.00109087
SLC25A1	0.00109368
HSPG2	0.00109464
FOXN2	0.00109613
ATP6V1G2	0.00109691
COMMD10	0.00109864
NPDC1	0.00110047
RAB6B	0.00110399
PCMTD1	0.00111243
DTNBP1	0.00111909
MAN1C1	0.00113318
SUMO3	0.00113574
GNE	0.00113687
NEIL1	0.0011406
SPCS3	0.00115051
IQGAP2	0.00115156
HYLS1	0.00115383
COPS8	0.00116269
MRPL48	0.00116374
DCTN5	0.00116519
GPR56	0.00117
THBD	0.00117588
MAN2C1	0.00117652
HLA-DPA1	0.00117861
ERMN	0.00118989
ARL4A	0.00120353
SNRPB	0.00120816
C6orf52	0.00120883
BTBD10	0.00121586
POLM	0.00122138
QPRT	0.00122518
LRP10	0.00122728
VTI1A	0.00122884
AP4M1	0.00123397
PDCD6	0.00123768
DECR2	0.00123894
ASXL1	0.0012457
C5orf55	0.00125208
ASAP1	0.00126676
AGPAT4	0.00127744
PIAS4	0.00127765
RFC2	0.00128563
ACOT4	0.00128741
UPB1	0.00128819
RRP7B	0.00129776
PDCD1LG2	0.00130038
ZNF713	0.00130095
SPATA5L1	0.00132236
CACNA1E	0.00132568
VPS16	0.00133715
LDHB	0.00133942
PON2	0.00134
HLA-DMB	0.00134768
AES	0.00135417
NPM1	0.00135566
C17orf59	0.00136498
ATG4B	0.00136616
WDR82	0.00136823
SDHA	0.00137079
RBM43	0.00137148
VNN2	0.00137151
CXCR5	0.00137586
SCD5	0.00139565
DCLRE1C	0.00139816
EIF5A	0.00140606
C17orf62	0.00141045
TCEA3	0.00142567
DIXDC1	0.00142789
PAFAH1B3	0.00143001
KIAA1407	0.00143512
PRR24	0.0014361
TRAPPC2L	0.00143613
LEKR1	0.00144073
ACAP3	0.00144398
UGDH	0.00144604
SLC25A41	0.00144723
KIF1C	0.00145301
DPM2	0.00146431
RGL1	0.0014686
SHARPIN	0.00147496
PTPMT1	0.00149464
B3GALT6	0.00149615
ZNF512B	0.00150165
DIP2A	0.00151598
BLM	0.00151785
SNAI3	0.0015358
PPIA	0.00153829
DGUOK	0.00154363
RPL12	0.00154563
INTS4	0.0015525
PSME1	0.00155308
GRK5	0.00155779
SGTA	0.00156201
BTN3A3	0.00156585
APLF	0.00157073
SF3B3	0.00158513
ZNF718	0.00158628
PVT1	0.00159144
RPL21	0.00159514
NUB1	0.00162038
SRP14	0.00162288
ETFB	0.00162436
POLD4	0.00163424
MAST2	0.00163458
CHD1L	0.00163537
SLC39A3	0.00163664
SH3BP2	0.00164251
MTHFD2L	0.00164418
MND1	0.00164533
ULK1	0.00165022
TMC8	0.00166056
HPS1	0.00166561
MFSD10	0.00167769
CUEDC1	0.00167912
KIR3DX1	0.00169331
CDC14A	0.00169664
ACOT13	0.00169805
SLC20A1	0.00170625
KHK	0.00170683
PLCH2	0.00170805
SIRPB1	0.00171016
ATXN10	0.00172105
PDE4DIP	0.00172428
ATP6V0C	0.00172589
CHIT1	0.00172948
PTPLAD1	0.00173451
BET1L	0.00173556
PEX5	0.00176743
QSOX1	0.00176862
SNHG3	0.00181009
SLC39A9	0.00181025
QPCTL	0.00181191
TMUB2	0.00182044
LENG9	0.00187411
AHCY	0.0018813
ZNF410	0.00189289
CYB5A	0.00189923
TTI1	0.0019
ARCN1	0.00190974
H1F0	0.00191698
ZDHHC7	0.00191892
AASS	0.00192157
UBIAD1	0.001923
SNHG9	0.0019237
NFIB	0.00193379
CA13	0.00193623
TRIM8	0.00193818
SBF1	0.00193971
PVRIG	0.0019472
RPS2	0.00195494
EIF4EBP3	0.00196379
ODF3B	0.0019774
ITPKB	0.00199627
C14orf79	0.00199794
HIP1R	0.00199819
RTEL1	0.00200315
GDPD5	0.00200698
PFKFB4	0.00202269
TFG	0.00203785
DZIP3	0.00204254
MPV17L2	0.00204361
ARSB	0.00205169
PRR3	0.00205417
GGA3	0.00206043
XBP1	0.00207143
CCR10	0.00210581
RPL9	0.00210725
TMEM30A	0.00211239
PDLIM1	0.00211447
ITGA6	0.00211619
RERE	0.00212968
PWP2	0.00213276
BLK	0.00214514
TRIM35	0.00215442
GALNT2	0.00215574
MSI2	0.00215745
CD180	0.00216205
ICAM5	0.00217291
HSD17B14	0.00217452
TTC39C	0.00217934
RNASEH2C	0.00218891
EFHB	0.00221839
JUND	0.00221859
KSR1	0.00222035
ITM2C	0.00222368
C3orf14	0.00222373
TNFSF9	0.00223732
LAMB3	0.00223904
QSER1	0.00224724
TECPR1	0.00225097
TRIM37	0.00225878
P2RY12	0.00228342
BTN2A1	0.00228391
TMEM119	0.0022983
ECHDC3	0.00230489
APOBEC3H	0.0023213
CCDC78	0.00233001
ENPP2	0.00234678
GMFG	0.00234681
KLRK1	0.00234735
PSMB4	0.00235374
PCDHGB6	0.00235634
TTC9	0.00235716
NFATC3	0.00237696
B4GALT7	0.00238808
DUOX1	0.00239301
MPST	0.0023965
DFNB31	0.00240069
KPNA3	0.0024056
HYAL3	0.00241106
ATG4D	0.00242313
PSMC4	0.00243972
PCGF6	0.00244183
MAPRE1	0.00245087
ZDHHC4	0.00245286
GNA12	0.00245957
ANKMY1	0.00246594
TPD52	0.00246651
ARHGAP22	0.00246941
SBDS	0.0024703
SPSB1	0.0024829
IL2RA	0.00248914
TMEM180	0.00249716
GABBR1	0.00250209
DCAKD	0.00251178
DLEU1	0.0025131
LRGUK	0.00251771
GIT1	0.00252652
XKR9	0.00252857
ZNF137P	0.00254199
RHOC	0.00255505
ZW10	0.0025564
UTP11L	0.00256676
SKI	0.00257085
COL18A1	0.00257852
SYNGR3	0.0025805
RHOBTB1	0.00259169
BRD3	0.00259404
ZADH2	0.00260477
N6AMT2	0.00261853
DGKQ	0.0026438
TMEM121	0.00265044
ZCCHC14	0.0026647
PYROXD2	0.00270228
C10orf128	0.00271551
HSPB1	0.00272067
SNHG1	0.00272775
ATMIN	0.00272957
RAD21	0.00274231
NUP37	0.00274283
TESK2	0.0027462
CFLAR	0.00277317
C21orf58	0.00277626
NAPG	0.00277998
PTPN18	0.00278131
TAPBP	0.00278214
LRRK1	0.0027826
ESYT1	0.00278431
XRRA1	0.00281425
PCGF3	0.00281514
COL4A3	0.00282458
CLDN7	0.0028291
THRA	0.00283411
RAP1GDS1	0.00283988
PMS2P4	0.00284217
RAB30	0.00286299
SORBS2	0.0028733
TBC1D10C	0.00287371
SLC25A37	0.00289089
SCARB2	0.00290056
ITPKC	0.0029008
TK2	0.0029109
LSG1	0.00293365
RNF11	0.00293555
CASP6	0.00294702
SLAMF8	0.0029573
TMEM175	0.00295976
HAVCR2	0.00296396
SAMD10	0.00297158
ADAT1	0.00298022
CORIN	0.00298182
UBE2Q2	0.00298347
TSC1	0.002991
ADCY7	0.00299649
PLIN3	0.00301889
TBKBP1	0.00303239
ORMDL3	0.00304048
UAP1	0.00304155
CEP350	0.00304352
RSBN1L	0.00304533
AGL	0.00308722
VAV2	0.00308741
CEP97	0.00308944
PTK6	0.0030897
WSB1	0.00309227
PALB2	0.00310778
FYB	0.0031149
PACSIN2	0.00312041
IL18BP	0.0031216
EPHX2	0.00312399
ATG10	0.00313522
SLC38A7	0.00313903
IMMT	0.00314193
WEE1	0.00314796
TMEM208	0.00315033
TNFRSF18	0.00317067
TET2	0.00317622
RAB11FIP5	0.00317697
WBSCR16	0.00317969
FBXO33	0.00320621
SRA1	0.00321032
ACTA2	0.00321987
SPTBN5	0.00322238
SLC37A2	0.00322826
BASP1	0.00324036
VWDE	0.00324693
PSMB5	0.00325311
DNAJB6	0.00327612
SLFN13	0.00328298
TPP2	0.00328628
VN1R1	0.00330635
TRIM17	0.00330981
ZNF436	0.00333427
CCDC85C	0.0033693
DENND2D	0.00337129
C9orf131	0.00337862
LGALS1	0.00337905
SMNDC1	0.00340201
AGA	0.00341333
FUT8	0.0034159
RBMS2	0.00341617
RNF157	0.00343808
GPR3	0.00344489
DHDH	0.00345797
NARG2	0.00346219
KLHL30	0.00347056
POLI	0.0034722
GAS2L1	0.00347679
POLA2	0.00348856
ZNF281	0.00349685
NDUFB2	0.00350092
DSE	0.00353286
CCDC93	0.00354015
GLB1L	0.0035415
ELMO3	0.00354252
CD59	0.00354685
CCDC88B	0.00355523
TRIM39	0.00355713
HAGH	0.0035679
H3F3B	0.00357985
EIF4E3	0.00358228
TYSND1	0.00359041
BCDIN3D	0.00359341
NHSL1	0.00360106
FAM63A	0.0036066
P2RX4	0.00360928
MRPL12	0.00364466
ADARB2	0.00365308
NUP93	0.00368085
C6orf89	0.00371656
C20orf196	0.00371773
ELMO2	0.0037254
NEK9	0.00373321
FAM162A	0.00373871
PRKCI	0.00376908
LRRC46	0.003775
BTG2	0.00378442
ZNF562	0.00379626
AQP3	0.00382695
HKDC1	0.0038415
GIGYF1	0.00386857
TIAL1	0.00387355
PSAP	0.0038832
PACS1	0.0038884
UMPS	0.00388955
RAB3GAP2	0.00391442
TRAF3IP3	0.00393208
CD37	0.00393644
PRR5L	0.0039399
TDP2	0.00394412
TUBGCP5	0.00396168
RPS6KA5	0.00399098
SLC9A3	0.00399334
OBFC1	0.00399459
TTC22	0.00399779
PDCD5	0.00401191
SFMBT1	0.00401806
FAM160A2	0.00402935
VIM	0.00403826
MDK	0.00404669
SLC6A16	0.00404983
ZNF765	0.0040589
MAST1	0.00407343
C2orf88	0.00407463
STEAP3	0.00409415
C19orf60	0.004114
SEMA3B	0.00411508
XRCC6BP1	0.00413404
UNC5B	0.00413995
PAPLN	0.00416107
BRD2	0.00416489
DNAJC17	0.00417146
SRD5A3	0.00417377
NF2	0.00417385
PIK3R3	0.00417537
ZFAND2B	0.00418414
TP53TG1	0.00420228
FAM173A	0.00420506
ST6GALNAC3	0.00422632
MOCS1	0.00423388
TNFRSF14	0.00424025
LSM4	0.00424278
TTC37	0.00426754
CCDC106	0.00427484
ZNF264	0.00429516
ARHGAP26	0.00431834
DDIT3	0.00432078
LSM14A	0.00432869
KCTD10	0.00436729
ALKBH4	0.0043991
RNASE4	0.0044012
LGALS8	0.0044211
C22orf46	0.00443033
EZR	0.00443151
CHPF2	0.00444426
CD55	0.00445587
PPDPF	0.00446968
INTS5	0.00448452
FAM13B	0.00451437
HEY2	0.00451866
PLXNA2	0.00452113
GCAT	0.0045437
HIC1	0.00456361
RBM6	0.00456385
MKRN1	0.00458333
MCC	0.00458884
ASCC2	0.00461456
SYS1	0.00462608
RAB8B	0.00462745
NOXA1	0.00464286
GATC	0.00464902
TMEM19	0.00465603
RELA	0.00466641
FAM179A	0.00470273
RPL31P11	0.00471785
DCAF5	0.00473264
TNFSF13	0.00473278
CDK5R1	0.00474578
BCL2A1	0.00476224
LARS2	0.0047699
THNSL1	0.00477374
MGLL	0.00478422
MPRIP	0.00478598
DNAJA2	0.0048273
CREB3	0.00486422
PLCL1	0.0048699
IRAK3	0.00488974
POLR2I	0.00489408
TNFAIP8	0.00490826
RBCK1	0.00490999
PQLC2	0.00492933
C21orf33	0.00494882
WIPI2	0.00494913
C12orf49	0.00496059
PRELID1	0.00496373
SYK	0.00498087
CUZD1	0.00501146
SAT2	0.00502144
RCC2	0.00502261
EMILIN2	0.00505812
CLC	0.00506194
TBCB	0.00506232
GLS	0.00507209
COMMD4	0.00507749
ZNF546	0.00510823
COL11A2	0.00511242
SNRNP40	0.00511712
ATP2C2	0.00513926
MPI	0.00516283
RNF168	0.00520034
MBTD1	0.00521342
ELMOD3	0.00521864
KIAA0226	0.00522937
PRRG2	0.00524831
PKD2	0.00526794
MIDN	0.00529258
KCNAB1	0.00531418
VASP	0.00532183
HPS3	0.00534353
FGD2	0.00535318
YIF1B	0.0053847
VPS8	0.00544133
PLEKHM1	0.0054418
ZNF684	0.00544763
SIDT1	0.00545391
SGK1	0.0054698
RIMS3	0.00546989
CCDC146	0.00547255
TTLL1	0.00547619
NUDT15	0.00549173
GPN3	0.00549753
SETD4	0.00550025
CD101	0.00552838
HADHB	0.00553605
BAI2	0.0055436
NCSTN	0.00557951
USP12	0.00559068
C8orf82	0.0055954
TIMP2	0.00559725
ACSF3	0.00566676
SRSF6	0.00566741
TNKS2	0.00567331
SEMA4D	0.00568038
OXER1	0.00569203
SIX5	0.00569353
MCCC1	0.00570004
DYNC1LI1	0.00570174
KIF20B	0.00572985
HMGB1	0.00573127
ANG	0.0057352
GPI	0.00573562
SEMA4F	0.0057422
STARD9	0.00574888
GALNS	0.00575796
USP20	0.00576043
SNX6	0.00576079
C22orf34	0.00577393
KCTD1	0.00579868
ST5	0.00580249
ADM2	0.00582169
ACAA1	0.00582703
IPCEF1	0.00583669
MAN2A2	0.00584943
AMDHD2	0.00585111
MED18	0.0058616
PBX3	0.00587732
MS4A6A	0.00588985
IQCD	0.00590016
PKIG	0.00592205
KIAA0319L	0.00593881
CANT1	0.00593908
FGFR1	0.00593919
RNF149	0.00594894
CCDC90B	0.00596173
BAG5	0.00598361
FBXO10	0.00599052
FBXO31	0.00600628
TADA2A	0.00602244
CELF1	0.00603846
HAUS4	0.00604678
ZBTB43	0.00604859
LGALS9	0.00609196
LFNG	0.00609493
TMOD4	0.00614333
EIF2B4	0.00614435
MNAT1	0.00614452
SYCE1L	0.00618748
SP110	0.00621896
ACSL3	0.00622502
UTP14C	0.00625586
GRN	0.00630298
TRAF1	0.00633226
IFIT5	0.00633493
ELOVL6	0.00633835
SERPINB8	0.00637434
CUTC	0.00641428
MCTP1	0.00642055
NUCKS1	0.00642216
SLC35A5	0.00643175
NSUN2	0.00646727
SPICE1	0.00647995
ADAL	0.006498
WASL	0.00653391
HIP1	0.00657561
KCNH2	0.0065806
ROGDI	0.00658787
HMGN3	0.00658957
FBXL16	0.00660211
PNPO	0.00662873
GPX4	0.00663753
TCN2	0.00666374
ENDOU	0.00670245
DTWD1	0.00670537
ADD1	0.00671709
PGD	0.00674563
ZNF746	0.00674646
TTC26	0.0067491
MYOM2	0.00676995
CABP1	0.00678379
CCDC64B	0.00679496
CDR2	0.00681026
PYCR1	0.00681727
OMG	0.00683139
RPAP3	0.00683205
LYPLA2P1	0.00686455
ASB1	0.00689024
PRORSD1P	0.00689729
CERCAM	0.00690469
CRAT	0.00691188
DCBLD2	0.00693655
KIAA2013	0.00696768
SPG21	0.00701238
GAA	0.00702149
CHI3L2	0.00705223
ATAT1	0.00705996
SERINC1	0.00706805
EMR1	0.00712211
ZWINT	0.00715362
TLR3	0.00717004
TESC	0.00717875
HSPA1A	0.00718251
SUN1	0.00718932
NAGPA	0.00721756
ATP13A2	0.00722241
ABLIM3	0.00723072
ZSCAN30	0.00728312
PCBD1	0.00728638
RPS10	0.00731075
IER3IP1	0.00733185
UNG	0.00733385
PRAM1	0.00736271
CHMP4A	0.00738523
SLC41A1	0.00739501
ZNF589	0.00740134
GSTP1	0.00740825
RPL24	0.00741529
TAF12	0.00742598
TNK1	0.00747807
CIDEB	0.00750602
MBLAC1	0.00752754
ALOX5AP	0.00754232
LCOR	0.00755011
MAT2B	0.00756299
RFC1	0.00756714
MEN1	0.00757646
ALDH16A1	0.00758003
ANKRD22	0.00758873
BRSK1	0.0075943
MYBPC2	0.00763006
NCKAP5L	0.00765079
GDF9	0.007653
AKR1A1	0.00765734
SLC25A29	0.00766172
IPO8	0.00767839
IDH1	0.00769854
CYP4F12	0.00770509
LHPP	0.00770557
ZNF792	0.00776194
SNX25	0.00779893
PPP2R5D	0.00785044
TRIM4	0.00785501
MAPK8IP2	0.00786429
EPB41L5	0.00787115
ZNF561	0.00787374
KLHL32	0.00793506
NUDT8	0.00796715
SUV420H2	0.00797075
DHRS9	0.00799178
C10orf10	0.00801091
WWOX	0.00801671
CARD16	0.00803265
MBD6	0.00804318
HPS5	0.00806522
HSPA1L	0.00806789
GIMAP2	0.00807049
CCDC28B	0.00808606
MPHOSPH8	0.008113
LARGE	0.00811667
SORL1	0.00812548
ITGB3BP	0.0081344
NANS	0.00814018
CASC4	0.00815133
RRP1	0.00816313
LYPD6B	0.00823285
CAPS	0.00824394
MEX3D	0.00826596
SURF6	0.00828049
NDUFB6	0.00828359
MUC4	0.0083007
AACS	0.00830097
SLC25A25	0.00831754
LIMK2	0.00832559
VTA1	0.00832968
COX6A1	0.00837874
BCAT1	0.00840508
CYP4F3	0.00846053
SMEK2	0.00848112
CNOT8	0.00850011
TEX264	0.00851945
LGMN	0.00853534
ZNRF1	0.00858111
TAGLN2	0.00861654
IL21R	0.00861897
PLOD1	0.00862772
LSP1	0.00863098
RAF1	0.00864493
LIPT2	0.0086585
GUCY2C	0.00867048
IARS2	0.00871225
TOP2B	0.00872415
ZNF592	0.00874052
FUZ	0.00876703
ST6GAL1	0.00878579
CACNA1A	0.00880017
EPN2	0.00880459
WDR62	0.00881537
EI24	0.00882949
ATP13A3	0.00884854
C15orf52	0.00885612
CD81	0.0088781
SLC2A4RG	0.00888115
CBLL1	0.00888265
WDR75	0.00889639
GUCA1B	0.00891109
LPIN1	0.00892963
ABHD6	0.00893107
LPCAT4	0.00894898
SCO1	0.00895425
ZNF385A	0.00896147
FAM73A	0.00897251
KIAA0100	0.00898373
PTGR1	0.00900076
DAPK1	0.00900638
CTSW	0.00902448
TRAK2	0.00903317
AVL9	0.00903727
HIST1H4H	0.00905074
SFXN3	0.00906036
MFN2	0.00909598
PPP2R4	0.00910923
PPP6C	0.00913376
GALM	0.00913391
DHRS1	0.00915593
EEF1D	0.00918499
AIM2	0.00919006
LMNB1	0.00919983
ROR2	0.00922385
PARVG	0.00923281
MLLT11	0.0092518
ATP10D	0.00925448
EIF4EBP2	0.00929183
INPP5J	0.00931027
PAK1	0.00931925
RNF212	0.00934254
UNC50	0.00936032
GATSL3	0.00936913
GOLT1B	0.00938227
ZNF320	0.00941059
MICA	0.00941734
COX18	0.00941857
ARHGAP33	0.00942894
B4GALT3	0.00948196
DMPK	0.00953627
IL7R	0.00955342
ATAD2	0.00955621
ZNF544	0.00957477
KIT	0.00958346
USP31	0.00959049
C4orf48	0.00960352
CBX6	0.00964831
MXD3	0.00965648
EGFL7	0.00966088
DDX28	0.00966885
CASP8	0.00967085
ABCA5	0.00969236
TIMD4	0.00970377
CARD6	0.00972316
DIP2B	0.00975698
PFKFB2	0.00976472
KPNA1	0.00976545
SKP1	0.00976732
C3orf17	0.00977245
COL6A2	0.00977334
CLEC16A	0.00979121
ZNF783	0.00980309
ZC3H14	0.00982732
METRN	0.00983153
PEMT	0.00983806
LMBR1	0.00988048
ZBTB7B	0.00988675
ERN1	0.00989684
BCAR1	0.00991604
ZNF30	0.00992872
APITD1	0.00993228
SLC44A2	0.00994095
GPT	0.00994096
ZFHX2	0.00995093
DPP9	0.00995351
ZNF668	0.00995551
ATP5A1	0.00997276
ERGIC1	0.0100157
RSAD1	0.0100165
ARFIP1	0.0100234
ENOSF1	0.0100296
LIPA	0.0100655
CNOT1	0.0100711
SP1	0.0100743
EPHB1	0.0100766
TWISTNB	0.010217
BCKDHA	0.0102216
RCHY1	0.0102393
MRPL34	0.0102452
LCP1	0.0102482
LMNA	0.0102837
NPRL3	0.0102927
PPFIA4	0.0102969
WARS	0.0103184
CDK5RAP3	0.0103282
ZC3HAV1	0.0103497
LIG1	0.0103907
REM2	0.0103991
TSSK6	0.0104021
BTBD9	0.0104157
ZGPAT	0.0104394
ZNF548	0.010455
SLC24A4	0.0104614
TEAD2	0.010466
ANKDD1A	0.0104848
PNMA1	0.0105107
POLR3F	0.0105129
KRBA1	0.0105301
NMUR1	0.0105316
KCNMA1	0.0105618
NSD1	0.0105624
DNAJB1	0.0105779
UBR4	0.010592
BTBD2	0.0106027
TMEM64	0.0106365
ALPL	0.0106521
SLC38A6	0.0106974
CDK6	0.0107143
RNF213	0.0107309
SPATC1	0.0108124
PREPL	0.0108148
PDGFB	0.0108285
SUSD1	0.0108481
EVI5L	0.0108492
DAPK2	0.0108806
SHISA5	0.010883
SH3BP5	0.0109179
FAM134A	0.0109194
PTTG1IP	0.0109378
DACT3	0.010994
SUPT3H	0.0110335
HIF1AN	0.0110416
SQLE	0.0110454
C1S	0.0110534
MDGA1	0.011073
FLVCR1	0.0110769
E2F4	0.0110891
NAT9	0.0111054
RMND5B	0.0111128
SMYD3	0.0111135
KCNH3	0.0111197
DDX20	0.011136
TNFRSF10D	0.0111434
STK11	0.0111603
ACPP	0.0111627
NEK7	0.0111783
ZFYVE27	0.0111838
SETD2	0.0112046
SH2B2	0.0112163
SLC30A5	0.0112225
PAX8	0.011223
FAM69B	0.0112321
RHOBTB2	0.0112583
MORN2	0.0113011
PHF10	0.0113535
DHRS13	0.0113784
TACC1	0.0114273
PSMA1	0.0114369
ANKRD16	0.0114417
SOS2	0.0114517
WWC1	0.0114533
LY6G5C	0.0114852
VMAC	0.0114927
SCN3A	0.0115023
GTF2H4	0.0115146
LLGL2	0.0115147
ADAMTSL5	0.0116357
ZNF395	0.0116416
ALKBH7	0.0116574
TBX6	0.0116671
ACAD11	0.0116874
RBMS3	0.0116946
CWF19L1	0.0116984
BIRC7	0.0117403
PLEKHH3	0.011751
PCOLCE	0.011793
SESTD1	0.0118027
DDX11	0.0118038
UBL5	0.0118479
STAP1	0.0118684
C17orf66	0.0118743
PDXDC1	0.011906
IFT88	0.0119619
DERL3	0.0119782
PAX5	0.0119798
POLR2A	0.0120016
HTR6	0.0120115
IQSEC1	0.012036
BCL7A	0.0120375
ISYNA1	0.0120834
ANKLE1	0.0121275
EP400NL	0.0121294
RAD52	0.0122221
N4BP2L1	0.0122494
TXN2	0.0122815
COPZ1	0.0122957
MYBPC3	0.0123152
C21orf49	0.0123224
CEP55	0.012345
ACTN3	0.0123575
TRMT12	0.0123673
VPS11	0.01239
DNAH1	0.0124462
LILRA2	0.0124549
GHRLOS	0.0124677
CD44	0.0124821
PELP1	0.012494
CNIH4	0.0125012
MRTO4	0.0125179
MCM6	0.0125302
CRY2	0.0125386
MRPS6	0.01255
SLC12A8	0.0125676
TOP3A	0.0125837
TMEM147	0.0125911
ABCB6	0.0126333
COG1	0.0126637
FEZ2	0.0127242
TOR2A	0.0127337
RASSF1	0.0127513
STK16	0.0127581
RNPEPL1	0.0127738
CHRNA5	0.0128045
DUSP10	0.0128221
PCTP	0.0128654
SUSD2	0.0128913
FEM1C	0.0128979
PSRC1	0.0128997
SEPN1	0.012903
RPA2	0.0129671
FHOD1	0.0129685
HES4	0.0129692
NUCB2	0.0130068
RPL7A	0.0130195
TOX	0.0130422
ASNSD1	0.0130843
DENND4A	0.0131056
PRRT1	0.0131146
CD7	0.0131222
PECR	0.0131416
HSD11B1L	0.0131693
MTSS1	0.0131845
CD244	0.0131886
LIN54	0.0132122
ARRDC2	0.0133141
ZNF470	0.0133493
MAP3K8	0.0133505
PTGER2	0.0133628
SPTBN1	0.0133818
LAP3	0.0134058
SP100	0.0134113
HPCAL4	0.013472
COL4A1	0.0135125
MAX	0.0135402
ST3GAL1	0.0135502
EHBP1	0.0135892
CCDC117	0.0136046
SS18L1	0.0136142
REEP4	0.0137134
DCAF15	0.0137458
ATP1B1	0.0137895
RNF187	0.0138059
DIABLO	0.0138073
FNBP4	0.0138269
XAB2	0.0138653
CORO1A	0.0139164
RWDD2A	0.0139182
ZNF132	0.0139408
CCNDBP1	0.0139488
RPAP2	0.0139617
CROCCP3	0.0139727
NPR2	0.0140138
GARNL3	0.0140299
MRPL54	0.0140343
PRF1	0.0140385
TMEM45A	0.0140523
PDE3B	0.0140953
TMEM8A	0.0140985
IRF7	0.0141441
C19orf44	0.0141588
RECQL	0.0141909
IGFBP2	0.0142096
FLI1	0.0142306
TMEM57	0.0142324
P2RY11	0.0142404
ANK1	0.01426
ZRANB3	0.0142607
CTNNA1	0.0142868
TRIM23	0.0142911
PSMD11	0.0143169
ERAP2	0.0143357
FKBP15	0.0143388
DLST	0.0143494
HLA-DRB6	0.0143524
PAPSS1	0.0143625
LYPD3	0.0144005
SARS2	0.0144012
FHDC1	0.0144424
MYL4	0.0144442
PIK3CD	0.0144682
GBGT1	0.0145008
ATP9B	0.0145267
TMEM123	0.0145535
PPL	0.0145568
CLN8	0.0146281
MED26	0.0146348
EIF1B	0.0146745
STAMBPL1	0.0147006
MICB	0.0147294
CYBA	0.0147457
DLEC1	0.0148347
PSMA3	0.0148369
PRPF31	0.0148408
RPS20	0.0148882
AXIN2	0.0149226
TICAM1	0.0149271
CD3E	0.0149272
TNFSF4	0.0149311
RFXAP	0.0149502
SLC4A2	0.0149586
PICK1	0.0149694
TAF4	0.0150563
CCDC7	0.0150681
SRRD	0.0151315
KYNU	0.0151523
RHBDF2	0.0151948
TATDN1	0.015228
EXD3	0.0152305
MERTK	0.0152442
SNHG12	0.0152521
ZNF440	0.0152637
LRFN4	0.0152964
TUBB	0.0153394
CNBP	0.0153419
DPAGT1	0.0153456
C9orf91	0.0153594
OSBPL1A	0.0153681
ATXN7L3B	0.0154148
CBR3	0.015432
SIGLEC5	0.0154444
TOM1	0.0154765
SNN	0.0154854
SUPT7L	0.0155567
CCDC57	0.0155861
C14orf166	0.0155955
CUL1	0.0155997
SLC25A26	0.0156143
[truncated: 9,951 more rows]

## Sheet: S8C
hgnc_symbol	P_Value	SKAT Model
C6orf48	1.27e-16	Both
MYL5	1.16e-14	Merge Score
TMED3	3.11e-14	Both
TBC1D24	3.91e-13	Both
MAN1B1	3.79e-11	Both
MDC1	3.92e-10	Both
GEN1	3.82e-09	Merge Score
HCST	1.26e-07	Both
ZNF277	1.41e-07	Both
ADI1	2.02e-07	Both
DEF6	2.23e-07	Both
MCMBP	2.47e-07	Both
CHMP7	1.27e-06	Both
TUBG2	2.56e-06	Merge Score
STOX1	4.28e-06	Both
MTIF2	5.43e-06	Both
CBR1	9.29e-06	Both
GMDS	1.06e-05	Both
DPEP2	1.8e-05	Merge Score
MRP63	2.35e-05	Z Score
RAD51	2.72e-05	Both
BCAS2	2.74e-05	Both
FAM160A1	6.71e-05	Merge Score
RIC3	9e-05	Both
ABT1	0.000141689	Both
RIN1	0.000267583	Merge Score
ARHGEF11	0.000391526	Both
C11orf35	0.000540332	Merge Score
CSNK1D	0.000620776	Both
MGAT1	0.000656459	Both
ANXA7	0.000705948	Both
KLHDC7B	0.000720738	Both
PASK	0.000782931	Z Score
MIIP	0.0008434	Both
CMKLR1	0.000878382	Merge Score
SCNM1	0.000907941	Merge Score
TOP1MT	0.0012622	Both
FCGBP	0.00128215	Both
SPSB2	0.00129606	Merge Score
C14orf159	0.00135657	Z Score
CNTNAP1	0.00137371	Z Score
IFNAR1	0.00151435	Merge Score
UPK3B	0.00158347	Both
ARNTL	0.0017521	Merge Score
TMCO4	0.00178333	Both
RPL29	0.0017896	Both
MVD	0.00185316	Both
GLTPD1	0.00228242	Merge Score
STRA13	0.00239369	Both
UBE3C	0.00278066	Both
NAGS	0.00288605	Both
WDR54	0.00300385	Z Score
TMEM154	0.00430556	Both
GNB2L1	0.00477415	Both
MPEG1	0.00494914	Merge Score
PIGN	0.00525693	Both
SH2B3	0.00572849	Merge Score
ORAI2	0.00625419	Merge Score
DERA	0.00692192	Both
CD300LB	0.00793926	Merge Score
RNF167	0.00830497	Both
ELOF1	0.00837664	Both
PHPT1	0.00975103	Merge Score
KIAA1875	0.0106365	Merge Score
ALDH3B1	0.0112055	Both
CD2BP2	0.0112656	Both
PARP14	0.0112684	Both
KCNJ15	0.0118204	Both
CEACAM1	0.0118967	Merge Score
KCNC3	0.0131453	Both
SHPK	0.0132108	Merge Score
ERMP1	0.0134735	Merge Score
C8orf76	0.0142118	Both
PPA2	0.0146978	Both
GPR125	0.0154921	Both
MRI1	0.0156915	Z Score
PTOV1	0.0157478	Merge Score
SGPP1	0.016036	Z Score
SIGLEC16	0.0161278	Both
TSSC1	0.0164225	Merge Score
SLC45A4	0.0176783	Both
EFHC1	0.0186499	Both
WDR41	0.0193913	Merge Score
SLC22A18	0.0198176	Merge Score
PSKH1	0.0201061	Both
ATF7	0.0208842	Merge Score
MYO18A	0.0212672	Merge Score
MTERFD2	0.0218673	Z Score
MAST3	0.0219005	Z Score
NT5M	0.0221755	Both
COMTD1	0.022593	Merge Score
HCK	0.0226523	Merge Score
LRRC45	0.0228471	Z Score
NOP56	0.0243789	Merge Score
PSMB8	0.0244088	Both
PNRC1	0.0263077	Merge Score
MDH2	0.0263462	Merge Score
PRKD2	0.0266622	Merge Score
MCM2	0.0274255	Both
SHMT1	0.0285743	Both
TPMT	0.0302152	Merge Score
CPSF3	0.0302985	Both
NAPRT1	0.0305937	Merge Score
FAIM3	0.0308703	Merge Score
OSBPL2	0.0336206	Merge Score
PAXIP1	0.0350114	Z Score
FNTB	0.0354116	Both
SH3BP1	0.0354897	Both
ARPC4	0.0361109	Both
GOLT1A	0.0361194	Merge Score
CPSF1	0.0364316	Merge Score
TRIB3	0.0366634	Both
ATG16L2	0.0367572	Merge Score
MYOM1	0.0372605	Merge Score
C9orf89	0.0379608	Both
MIS12	0.0398498	Merge Score
CATSPERG	0.0399773	Merge Score
VRK3	0.043633	Z Score
C12orf57	0.0444187	Merge Score
SH3BP5L	0.0451259	Both
GRWD1	0.0459017	Merge Score
POLR3GL	0.0466731	Merge Score
RAB27A	0.0467473	Merge Score
KPTN	0.04699	Merge Score
RFC5	0.0474774	Both
ESYT2	0.0484065	Merge Score
TRIM38	0.0498802	Both
CXXC5	0.0508864	Both
LIN7A	0.0527316	Merge Score
SMPD2	0.0529306	Merge Score
ADPRH	0.0558011	Both
C11orf80	0.0585939	Merge Score
NUP214	0.0602251	Z Score
LOXL3	0.0615234	Both
SNX17	0.0623615	Merge Score
GLYR1	0.0636708	Merge Score
FDXR	0.0638051	Merge Score
MAF1	0.0646527	Merge Score
LAMA5	0.065912	Both
ARHGEF17	0.0677023	Both
ZC3H12D	0.0686526	Merge Score
NDST1	0.0743981	Merge Score
INTS8	0.0747154	Both
SLC2A11	0.0754004	Merge Score
MTRR	0.0754921	Both
TMBIM4	0.0757018	Merge Score
GART	0.0762881	Merge Score
CPNE1	0.0789394	Merge Score
NOP10	0.0800484	Both
TNKS	0.0801167	Both
FBF1	0.0810386	Merge Score
SLC16A13	0.0815951	Merge Score
EIF3D	0.0823211	Merge Score
SMAD1	0.0823957	Both
PRDX3	0.0850444	Both
GLOD4	0.0855364	Both
AURKB	0.0875146	Merge Score
TM6SF1	0.0883826	Both
TMEM115	0.0891787	Z Score
ZCWPW1	0.0920102	Both
RAB7L1	0.0920355	Both
CMTM7	0.0923214	Both
PGM1	0.0929273	Both
LZTR1	0.0942254	Both
RAPGEF1	0.100691	Merge Score
SCNN1D	0.101321	Merge Score
RPF1	0.103586	Z Score
FAM168A	0.105567	Both
GPR35	0.106251	Both
CASKIN2	0.107193	Both
SPAG7	0.107704	Merge Score
UBLCP1	0.107902	Both
PAQR4	0.109312	Both
CDK18	0.11412	Both
P2RX4	0.118743	Z Score
SYNGR1	0.119443	Merge Score
ATR	0.119768	Both
PBX2	0.121394	Both
SEC61A2	0.123351	Both
DCXR	0.124442	Merge Score
ZNF672	0.13006	Both
C7orf13	0.132096	Both
PVRL2	0.134617	Both
NDRG1	0.141459	Both
ULK4	0.144208	Both
TRIM62	0.144738	Z Score
LYSMD2	0.145052	Both
GTF2H1	0.149896	Merge Score
TYK2	0.15005	Merge Score
ZNF619	0.150833	Both
PYGB	0.150876	Merge Score
SNX32	0.152531	Merge Score
KIAA1598	0.154727	Both
CBX7	0.165256	Both
NICN1	0.166009	Z Score
EIF4A3	0.166753	Merge Score
TDP1	0.167024	Both
LNPEP	0.167042	Z Score
EFEMP2	0.168476	Merge Score
ITGA3	0.171741	Merge Score
RANBP3	0.173013	Merge Score
NDUFB6	0.17877	Z Score
HSPA1A	0.181777	Z Score
RPUSD2	0.190676	Merge Score
MED13	0.190926	Z Score
DOK1	0.19349	Both
ADAP1	0.210666	Merge Score
POLR1A	0.211202	Both
SAMM50	0.211847	Merge Score
SCRN2	0.217869	Merge Score
TPCN2	0.220632	Both
NMNAT1	0.221432	Both
BCR	0.222016	Merge Score
MT3	0.22354	Merge Score
DAD1	0.228186	Merge Score
PLEKHJ1	0.228552	Merge Score
PARP12	0.230566	Merge Score
FPGS	0.231502	Z Score
HERC6	0.236971	Both
TMEM180	0.237546	Z Score
EFNA3	0.237681	Merge Score
POT1	0.238575	Both
SDHB	0.239145	Both
C8orf33	0.239272	Both
TRIM41	0.239737	Merge Score
HLA-DPB2	0.239931	Both
TGIF1	0.240729	Merge Score
EMG1	0.244175	Both
FLYWCH1	0.248138	Merge Score
C6orf47	0.249296	Z Score
C16orf86	0.251296	Merge Score
TJP3	0.252743	Merge Score
HECW2	0.260617	Merge Score
PPIL3	0.262377	Both
2020-09-09	0.266487	Z Score
HIST1H3E	0.267212	Both
AGER	0.271002	Both
NAP1L1	0.271608	Merge Score
TIGD6	0.273273	Merge Score
ICMT	0.281985	Merge Score
PQLC1	0.282364	Z Score
HCG18	0.28249	Merge Score
HADHA	0.2839	Both
CLEC2D	0.2921	Merge Score
RCN3	0.293988	Merge Score
MYBL2	0.298055	Merge Score
OCEL1	0.302646	Merge Score
ADA	0.30472	Z Score
FOXRED1	0.306103	Both
FAM24B	0.309653	Both
FGF11	0.319192	Both
MCM3AP	0.32234	Both
CYP4V2	0.327515	Merge Score
NT5C	0.328172	Both
RAB11FIP3	0.330189	Merge Score
OGG1	0.330624	Merge Score
NGRN	0.331917	Merge Score
HIST1H2BD	0.338453	Z Score
FAM167B	0.347401	Both
SH2D2A	0.351641	Merge Score
TFB1M	0.353806	Merge Score
MED19	0.357152	Merge Score
CHD6	0.360114	Merge Score
GRAMD1C	0.360135	Both
PODXL2	0.360823	Merge Score
CDHR1	0.365113	Merge Score
SCAMP4	0.368966	Both
ISCU	0.371474	Z Score
WDR74	0.375131	Both
ZDHHC24	0.378675	Both
FAM111A	0.382539	Merge Score
DTNB	0.38474	Merge Score
MPZ	0.385552	Both
LY75	0.387919	Z Score
ACAD9	0.387932	Both
PPP1R13L	0.390788	Merge Score
IL10	0.390935	Merge Score
IQCE	0.408089	Merge Score
RPL38	0.412709	Both
PFKP	0.413065	Merge Score
ADORA2B	0.413742	Both
ABCB9	0.419699	Merge Score
SLC6A12	0.421378	Both
LRRFIP2	0.430044	Both
VARS2	0.430605	Merge Score
TFAM	0.431199	Both
ENO2	0.431902	Both
PCK2	0.433282	Merge Score
AFMID	0.438013	Both
GSDMB	0.442084	Merge Score
GTF2I	0.445185	Z Score
DDX19A	0.445347	Both
SLC17A9	0.445668	Merge Score
ARHGAP19	0.446779	Merge Score
PTGIR	0.457307	Merge Score
ZNF655	0.462999	Both
CBLN3	0.463749	Z Score
C7orf26	0.467904	Merge Score
NUDT1	0.468279	Both
BSCL2	0.469707	Both
CC2D2A	0.470936	Both
SLC25A15	0.472685	Both
EXOC2	0.478388	Merge Score
SLC39A4	0.481723	Both
POLE	0.487446	Z Score
ZFAND2A	0.489601	Both
MICALL1	0.491216	Z Score
EIF2AK3	0.497106	Z Score
NQO1	0.502689	Both
TCF19	0.511307	Both
RND1	0.511383	Both
CTSZ	0.511916	Both
ZBTB3	0.523237	Z Score
ZNF16	0.528774	Both
MUTYH	0.529444	Merge Score
TMOD2	0.535421	Both
UCP3	0.54704	Merge Score
FNBP1	0.555889	Both
GPM6A	0.556758	Merge Score
GRM2	0.572983	Z Score
PIGM	0.581247	Merge Score
ESPN	0.587332	Merge Score
SH3BGRL3	0.589159	Merge Score
MAPK3	0.599016	Z Score
ARSA	0.602206	Both
ZNF776	0.604346	Both
TRIM14	0.610274	Z Score
CD180	0.629565	Z Score
SCAMP5	0.630382	Both
CPNE8	0.633257	Merge Score
UROD	0.633578	Merge Score
LYSMD1	0.635103	Z Score
NFRKB	0.636692	Merge Score
COPA	0.645274	Z Score
NUP205	0.658374	Merge Score
ZNF217	0.662635	Merge Score
ZNF436	0.664024	Z Score
TMEM143	0.671233	Merge Score
ARRB2	0.674147	Both
PRCP	0.674481	Merge Score
HHLA3	0.681035	Z Score
C18orf54	0.68247	Both
ZNF18	0.686369	Both
EIF4A1	0.686747	Z Score
RAB8A	0.688026	Z Score
ARFGAP1	0.694729	Z Score
CSRNP1	0.69581	Merge Score
TIAM1	0.696962	Both
YOD1	0.701479	Merge Score
ENDOG	0.704016	Both
COMMD4	0.715829	Z Score
MRPS16	0.716696	Both
GTF3C5	0.717224	Both
SLC4A1AP	0.719859	Merge Score
HECTD3	0.727807	Both
BPHL	0.735907	Both
RNASEK	0.73828	Both
MRPS11	0.742111	Both
RCN2	0.760012	Merge Score
RNF170	0.764183	Both
MICAL1	0.780861	Z Score
HSPA1B	0.793501	Both
HCG11	0.799516	Both
MIF	0.822766	Merge Score
CCDC25	0.851049	Merge Score
EIF2S1	0.86191	Merge Score
RRAD	0.873751	Z Score
CD96	0.878949	Z Score
PCNT	0.890438	Both
ZNF273	0.909343	Both
SNAPC1	0.913179	Merge Score
MFF	0.925042	Both
STX7	0.928454	Both
KDM1A	0.928613	Merge Score
ACSS1	0.929849	Both
DDX18	0.933965	Both
CCNG1	0.936176	Z Score
TYW1B	0.943986	Both
ABCF1	0.947913	Merge Score
GPATCH2	0.949071	Z Score
TMEM55A	0.951932	Merge Score
STMN1	0.965302	Merge Score
NME7	0.970199	Z Score
BRF1	0.979244	Merge Score
AGA	0.981312	Z Score
ZMYND10	0.986127	Merge Score
C9orf78	0.998575	Merge Score
LRRC37BP1	1	Both
